# Unifying the Identification of Biomedical Entities with the Bioregistry

Charles Tapley Hoyt<sup>1</sup>, Meghan Balk<sup>2</sup>, Tiffany J. Callahan<sup>3</sup>, Daniel Domingo-Fernández<sup>4,5</sup>, Melissa A. Haendel<sup>3</sup>, Harshad B. Hegde<sup>6</sup>, Daniel S. Himmelstein<sup>7</sup>, Klas Karis<sup>1</sup>, John Kunze<sup>8</sup>, Tiago Lubiana<sup>9</sup>, Nicolas Matentzoglou<sup>10</sup>, Julie McMurry<sup>11</sup>, Sierra Moxon<sup>6</sup>, Christopher J. Mungall<sup>6</sup>, Adriano Rutz<sup>12,13</sup>, Deepak R. Unni<sup>6,14</sup>, Egon Willighagen<sup>15</sup>, Donald Winston<sup>16</sup>, and Benjamin M. Gyori<sup>1,\*</sup>

<sup>1</sup>Laboratory of Systems Pharmacology, Harvard Medical School

<sup>2</sup>University of Arizona

<sup>3</sup>University of Colorado Anschutz Medical Campus

<sup>4</sup>Department of Bioinformatics, Fraunhofer SCAI

<sup>5</sup>Enveda Biosciences

<sup>6</sup>Lawrence Berkeley National Laboratory

<sup>7</sup>Related Sciences

<sup>8</sup>California Digital Library, University of California

<sup>9</sup>School of Pharmaceutical Sciences, University of São Paulo

<sup>10</sup>Semanticly

<sup>11</sup>University of Colorado, Anschutz Medical Campus

<sup>12</sup>School of Pharmaceutical Sciences, University of Geneva

<sup>13</sup>Institute of Pharmaceutical Sciences of Western Switzerland, University of Geneva

<sup>14</sup>European Molecular Biology Laboratory

<sup>15</sup>Department of Bioinformatics - BiGCaT, NUTRIM, Maastricht University

<sup>16</sup>Polyneme LLC

\*corresponding author(s): Benjamin M. Gyori ([benjamin\\_gyori@hms.harvard.edu](mailto:benjamin_gyori@hms.harvard.edu))

## ABSTRACT

The standardized identification of biomedical entities is a cornerstone of interoperability, reuse, and data integration in the life sciences. Several registries have been developed to catalog resources maintaining identifiers for biomedical entities such as small molecules, proteins, cell lines, and clinical trials. However, existing registries have struggled to provide sufficient coverage and metadata standards that meet the evolving needs of modern life sciences researchers. Here, we introduce the Bioregistry, an integrative, open, community-driven metaregistry that synthesizes and substantially expands upon 20 existing registries. The Bioregistry addresses the need for a sustainable registry by leveraging public infrastructure and automation, and employing a progressive governance model centered around open code and open data to foster community contribution. The Bioregistry can be used to support the standardized annotation of data, models, ontologies, and scientific literature, thereby promoting their interoperability and reuse. The Bioregistry can be accessed through <https://bioregistry.io> and its source code and data are available under the MIT and CC0 Licenses at <https://github.com/biopragmatics/bioregistry>.

## 1 Introduction

One of the key challenges in creating and maintaining Findable, Accessible, Interoperable, and Reusable (FAIR)<sup>1-3</sup> data in the life sciences is the standardized identification of entities ranging from chemicals, proteins, and diseases to patents and publications. These entities are typically curated in *identifier resources* (e.g., ontologies and databases) such as Chemical Entities of Biomedical Interest (ChEBI)<sup>4</sup>, UniProt<sup>5</sup>, and PubMed that assign to each entity a *local unique identifier* (i.e., accession number). Each resource defines an internally consistent pattern for its entities' local unique identifiers, such as the combination of numbers and letters found in UniProt identifiers (e.g., P0DP23) or the simple numbers found in PubMed identifiers (e.g., 29175850). Uniform resource identifiers (URIs) (e.g., <https://www.uniprot.org/uniprot/P0DP23>) and compact uniform resource identifiers (CURIEs) (e.g., `uniprot:P0DP23`) have become the predominant syntaxes used in the life sciences for identifying entities that encode both the resource from which the entity originates and its local unique

37 identifier<sup>6</sup>. URIs encode the resource with a *URI prefix* (e.g., <https://www.uniprot.org/uniprot/>) while CURIEs  
38 encode it with a *prefix* (e.g., uniprot).

39 However, even when using URIs and CURIEs, a number of challenges remain in establishing consistency and interoperability.  
40 Namely, several different incompatible URIs and CURIEs can be used to refer to the same entity. For example, the local unique  
41 identifier P0DP23 for the entry in UniProt<sup>5</sup> about the Calmodulin-1 protein can be represented by at least seven distinct URIs  
42 and three distinct CURIEs (see Supplementary Tables 1 and 2 for details). This problem is compounded when attempting to  
43 integrate multiple resources, a cornerstone of modern computational life sciences. For example, genomic data from HGNC<sup>7</sup> can  
44 not be readily integrated with biochemical reactions data from Rhea<sup>8</sup> because HGNC uses the prefix *ec-code* and Rhea uses  
45 the prefix *EC* when referring to entities in the Enzyme Commission identifier resource<sup>9</sup>. Similarly, many biomedical resources  
46 construct local unique identifiers for the same entity in the Enzyme Commission identifier resource differently, e.g., 1.4.-.-  
47 in the Gene Ontology (GO)<sup>10</sup>, 1.4.\* in ChEBI, and 1.4 in IntEnz<sup>11</sup> for *Oxidoreductases acting on the CH-NH2 group of*  
48 *donors*.

49 In order to standardize the usages of URIs and CURIEs and therefore enable their interoperability, a *registry* is needed  
50 containing canonical, validatable definitions of identifier resources that, for each resource, includes a prefix, a URI prefix,  
51 a local unique identifier pattern, and other associated metadata. Registries thus capture for each identifier resource how to  
52 construct, parse, and interchange canonical URIs and CURIEs. A registry can be used by external biomedical resources to  
53 standardize the way they reference entities (e.g., database cross-references appearing in ontologies) to promote integration  
54 with other resources, as well as by consumers to navigate prefixes and their associated metadata. Multiple registries<sup>12-14</sup> have  
55 been previously built for this purpose, but they each suffer from substantial gaps in their coverage of known resources and the  
56 metadata captured about these resources. They also lack interoperability among each others' entries, for example, the National  
57 Center for Biotechnology Information Taxonomy Database (NCBITaxon)<sup>15</sup> is prefixed as *taxonomy* in Identifiers.org<sup>12</sup> and  
58 as *NCBITAXON* in BioPortal<sup>16</sup>.

59 These issues are exacerbated by shortcomings in existing registries' governance and curation workflows, which impede  
60 their ability to stay current, trustworthy, and engage the community as the landscape of life science resources rapidly evolves.  
61 These issues include, that they 1) are built on private infrastructure within an institution; 2) are maintained by small, private  
62 groups that - due to under-funding - struggle to respond to requests; 3) lack adequate support for external contributions 4) are  
63 neither versioned nor archived. As an alternative to general-purpose registries, numerous projects (e.g., GO, Cellosaurus<sup>17</sup>,  
64 GenBank<sup>18</sup>) have created their own registries, however, these each only cover identifier resources relevant for the given project,  
65 and use standards that are only internally consistent to the project. Finally, several services act as registries but are by design  
66 limited in scope to include a selected set of resources and provide incomplete metadata necessary to promote the standardization  
67 of references. These include the Open Biomedical Ontologies (OBO) Foundry<sup>19</sup>, Ontology Lookup Service (OLS)<sup>20</sup>, and  
68 BioPortal<sup>16</sup>. A detailed survey of the governance and maintenance models for existing registries can be found in Supplementary  
69 Table 3. Overall, the content of any one registry does not reflect the evolving landscape of biomedical resources and thus satisfy  
70 user needs.

71 To overcome the limitations of existing registries, a new approach for building a biomedical registry is necessary, which  
72 ideally fulfills the three requirements: 1) integrative, 2) open, and 3) community-driven. First, an *integrative* registry re-uses,  
73 improves, and extends on existing registries. Given that existing registries define conflicting standards (i.e., assign conflicting  
74 prefixes, URI prefixes, or other metadata for the same identifier resource) and therefore lack interoperability, this necessitates  
75 alignment and harmonization among resources in each registry. Second, an *open* registry makes its underlying data and  
76 associated code available under permissive licenses in a public, version-controlled repository, and relies on free, publicly  
77 available infrastructure for semi-automated quality control and deployment. Third, a *community-driven* registry solicits  
78 contributions from community members and provides an appropriate technical platform and governance structure to support  
79 this. This technical platform needs to support discussion and feedback as well as quality assurance workflows tightly coupled to  
80 the underlying open data, code, and infrastructure. Overall, these properties are expected to promote the sustainability and  
81 longevity of the registry.

82 To address these limitations, we introduce the Bioregistry: an integrative, open, and community-driven metaregistry.  
83 The Bioregistry integrates content from existing registries, semi-automatically identifies equivalences between records in  
84 existing registries, and resolves conflicts between them using a novel workflow. The result of this alignment makes the  
85 Bioregistry a *metaregistry* (i.e., a registry of registries) which, for each resource, maintains cross-registry mappings to serve as  
86 an interoperability layer between conflicting standards. The Bioregistry also includes substantial manual curation for resources  
87 not appearing in any pre-existing registry, and additional curation extends and improves on the metadata associated with  
88 resources in these registries. As a result of this process, the Bioregistry expands substantially on the content of each individual  
89 pre-existing registry (e.g., 81% over Identifiers.org) as well as all aligned registries combined (see Table 2 on alignment).  
90 The Bioregistry also provides a higher granularity data model compared to any existing registry thereby better supporting  
91 integration. The Bioregistry is built using open source code, open data, and leverages public infrastructure and automation to

92 support its maintenance and extension. Further, it has well-defined contribution guidelines and a multi-institutional governance  
93 model that enables contributions directly from the broader community to support the project's longevity.

94 The Bioregistry (0.5.36) integrates content from and aligns 20 external registries and contains 1,410 individual records.  
95 These records extend on each prior registry (as compared to e.g., 838 records in BioContext<sup>21</sup> and 796 in Identifiers.org<sup>12</sup>), as  
96 well as all aligned registries combined: 159 of the Bioregistry's 1,410 records are novel, i.e. they do not appear in any existing  
97 registry. The Bioregistry also adds novel curated metadata for 807 of the remaining 1,238 records (65% of all records). A  
98 summary of the content captured in Bioregistry is provided in [Table 1](#). We provide detailed metrics and comparison to other  
99 resources in the Results section.

| Category                         | Count |
|----------------------------------|-------|
| External registries imported     | 20    |
| Individual resources represented | 1,418 |
| Cross-registry resource mappings | 6,675 |
| Contributors                     | 15    |

**Table 1.** Overview statistics of the Bioregistry version 0.5.36 (2022-07-07).

100 The Bioregistry has already been integrated with several projects aimed at data integration, knowledge assembly, and  
101 semantically annotated publications, described in [section 3](#) on use cases and integrations. Current integrations of Bioregistry  
102 include BridgeDb<sup>22</sup>, PheKnowLator<sup>23</sup>, Manubot<sup>24</sup>, Biomappings<sup>25</sup>, SSSOM<sup>26</sup>, INDRA<sup>27</sup>, and the OBO Foundry<sup>19</sup>.

103 The Bioregistry is available through an interactive web portal (<https://bioregistry.io>), an OpenAPI-documented  
104 web service (<https://bioregistry.io/apidocs>), a Python software package ([https://pypi.org/project/  
105 bioregistry/](https://pypi.org/project/bioregistry/)), and a Docker image (<https://hub.docker.com/r/biopragmatics/bioregistry>). All un-  
106 derlying data, code, and governance documentation are accessible through GitHub ([https://github.com/biopragmatics/  
bioregistry](https://github.com/biopragmatics/<br/>107 bioregistry)) under the MIT and CC0 licenses and archived on Zenodo<sup>28</sup>.

## 108 2 Results

### 109 Bioregistry Data Model

110 The Bioregistry uses a granular and extensible data model to represent records of identifier resources. Required fields for each  
111 record include a canonical prefix, a human-readable label, a homepage, and a description. The data model also allows for  
112 multiple optional fields including the license, version, prefix synonyms for the resource, and capturing whether the resource  
113 is deprecated or proprietary. Each record can further include an example local unique identifier, a regular expression pattern  
114 for validating local unique identifiers, and a URI format string for constructing URIs from local unique identifiers. Records  
115 describing ontologies can include optional download links for associated OBO, OWL, and OBO Graph JSON artifacts. To  
116 keep contributions traceable and provide attribution, each record captures the submitter and reviewer who contributed to the  
117 entry. Records can also be grouped into collections for better contextualization, such as prefixes useful for the Semantic Web  
118 (e.g., DC, FOAF, RDF, RDFS).

119 A comparison between the data model and various properties of the Bioregistry and external registries in [Table 2](#) demon-  
120 strates the heterogeneity of metadata standards in external registries and the flexibility of the Bioregistry to represent more  
121 granular metadata. For example, this enables the Bioregistry to represent deprecated and obsolete records for posterity, such  
122 as [hgnc.genefamily](#) (the HGNC Gene Family resource<sup>29</sup>) which was replaced by [hgnc.genegroup](#), and [casspc](#) (Eschmeyer's  
123 Catalog of Fishes<sup>30</sup>) which is used by the Teleost Taxonomy Ontology<sup>31</sup> and Vertebrate Taxonomy Ontology<sup>32</sup> but was itself  
124 never published.

125 Importantly, the Bioregistry captures not only individual resource records but also semantic relationships between records  
126 (including e.g., *depends on*, which asserts that one resource reuses terms from another, such as GO depends on ChEBI, and  
127 mappings of each resource to external registries where it appears. These additional relations constitute the Bioregistry's  
128 *metaregistry*, a term meant to represent the fact that it creates links among previously incompatible resources through a set of  
129 cross-registry mappings.

130 The Bioregistry data model is described in further detail in Supplementary Section 3.

### 131 Integration and harmonization of existing registries

132 The Bioregistry imports records from 20 external registries. We divided registries into distinct groups to which we applied  
133 different import policies ranging from registries imported entirely to ones from which metadata for only select records are  
134 imported (see Methods). The Bioregistry uses a multi-stage process in which registries are sequentially imported such that a

| Registry                      | Metadata Model |          |       |            |            |          |                |               |         |         |         | Capabilities and Qualities |        |                 |          |        |
|-------------------------------|----------------|----------|-------|------------|------------|----------|----------------|---------------|---------|---------|---------|----------------------------|--------|-----------------|----------|--------|
|                               | Name           | Homepage | Desc. | Example ID | ID Pattern | Provider | Alt. Providers | Alt. Prefixes | License | Version | Contact | FAIR Data                  | Search | Prefix Provider | Resolver | Lookup |
| Bioregistry                   | Y              | Y        | Y     | Y          | o          | o        | o              | o             | o       | o       | o       | Y                          | Y      | Y               | Y        |        |
| AberOWL <sup>33</sup>         | Y              | Y        | Y     | -          | -          | -        |                |               | o       |         |         | Y                          | Y      | Y               |          | Y      |
| AgroPortal <sup>34</sup>      | Y              | Y        | Y     | -          | -          | -        |                |               | o       | o       | o       |                            |        | Y               |          |        |
| BioContext <sup>21</sup>      |                |          |       |            |            |          | o              |               |         |         |         | Y                          |        | Y               |          |        |
| Biolink <sup>35</sup>         | Y              |          |       |            |            |          |                |               | o       |         |         | Y                          |        |                 |          |        |
| BioPortal <sup>16</sup>       | Y              | Y        | Y     | -          | -          | -        |                |               |         | Y       | o       |                            |        | Y               |          |        |
| Cellosaurus <sup>17</sup>     | Y              | Y        |       |            |            |          | Y              |               |         |         |         | Y                          |        |                 |          |        |
| CHEMINF <sup>36</sup>         | Y              |          |       |            |            |          |                |               |         |         |         |                            |        | Y               |          |        |
| CropOCT <sup>37</sup>         | Y              | -*       |       | -          | -          | -        |                |               |         |         |         | Y                          | Y      | Y               |          |        |
| EcoPortal <sup>38</sup>       | Y              | o        | Y     | -          | -          | -        |                |               | o       | o       | o       |                            |        | Y               |          |        |
| FAIRSharing <sup>39</sup>     | Y              | Y        | Y     |            |            |          |                |               |         |         | Y       |                            | Y      | Y               |          |        |
| GO <sup>10</sup>              | Y              | o        | o     | o          | o          | o        | o              |               |         |         |         | Y                          |        |                 |          |        |
| Identifiers.org <sup>12</sup> | Y              | Y        | Y     | Y          | Y          | Y        | o              |               |         |         |         | Y                          | Y      | Y               | Y        |        |
| N2T <sup>13</sup>             | Y              | Y        | Y     | Y          | Y          | Y        | o              | o             |         |         |         | Y                          |        | Y               | Y        |        |
| GenBank <sup>18</sup>         | Y              | Y        |       | Y          |            |          |                |               |         |         |         |                            |        |                 |          |        |
| OBO Foundry <sup>19</sup>     | Y              | Y        | Y     |            |            |          |                |               | Y       |         | Y       | Y                          |        | Y               | Y        |        |
| OLS <sup>20</sup>             | Y              | o        | Y     | -          | -          | -        |                |               | Y       | o       | o       | Y                          | Y      | Y               |          |        |
| OntoBee <sup>40</sup>         | Y              | Y        | Y     | -          | -          | -        |                |               |         |         | Y       |                            |        | Y               |          | Y      |
| Prefix Commons <sup>14</sup>  | Y              | o        | o     | o          | o          | o        | Y              | o             |         |         |         | Y                          | Y      | Y               |          |        |
| UniProt <sup>5</sup>          | Y              | Y        |       |            |            |          | Y              |               |         |         |         | Y                          | Y      | Y               |          |        |
| Wikidata                      | Y              | o        | Y     | o          | o          | o        | o              |               | o*      | o*      | o*      | Y                          | Y      | Y               |          |        |

**Table 2.** An overview of registries covering biomedical ontologies, controlled vocabularies, and databases. A "Y" means the field is required. A "o" means it is part of the schema, but not required or incomplete on some entries. A blank cell means that it is not part of the metadata schema. A "-" means some fields (i.e., Example ID, Default Provider, Alternate Providers) are omitted because inclusion would be redundant, e.g., for lookup services like the OLS. The FAIR column denotes that a structured dump of the data is easily findable, accessible, and in a structured format in bulk. The search column means there is a URL into which a search query can be formatted to show a list of results. The prefix provider column means there is a URL into which a prefix can be formatted to show a dedicated page for its metadata. \*Caveats: Several of Wikidata's fields can be accessed indirectly with alternative SPARQL queries. BioPortal's data is locked behind an API that requires a key and has rate limited access. The Crop Ontology Curation Tool does not list homepages because it is the homepage itself. Non-english language registries in the OntoPortal Alliance (<https://ontoportal.org>) were not included.

record from a given registry is either 1) aligned with an existing Bioregistry record and a cross-registry mapping is created 2) added as a new record, or 3) set aside for manual curation (see Methods). The key challenge in this import process is aligning (i.e., finding equivalences between) records since the external registries' records are partially overlapping but inconsistent. This inconsistency stems from high heterogeneity among existing registries in the usage of capitalization (e.g., *go* vs. *GO*), punctuation (e.g. *ec-code* vs *eccode*), abbreviations (e.g., *flybase* vs. *fb*), and even different vocabulary (e.g., *intenz* vs. *eccode*) to represent the same resource, which results in fragmentation and lack of interoperability. A novel contribution of the Bioregistry is that it explicitly represents the results of its alignment procedure as equivalence mappings between its own records and records in external registries. This constitutes a network of cross-registry mappings (with Bioregistry as the hub), creating a metaregistry. The Bioregistry's alignment procedure recovers a total of 6,675 such cross-registry mappings thereby connecting resources across existing registries that were previously disconnected.

We additionally curated 388 synonyms used when referring to identifier resources outside registries such as in OBO Foundry ontology database cross-references. These synonyms support the registry alignment workflow and broaden the ability of Bioregistry to standardize references to identifier resources beyond just external registries.

We investigated how the content of the integrated Bioregistry compares to each individual external registry that it imports and aligns (Figure 1A). It covers several registries (BioContext<sup>21</sup>, CHEMINF<sup>36</sup>, Crop Ontology Curation Tool (CropOCT)<sup>37</sup>, OBO Foundry<sup>19</sup>, OLS, Name-to-Thing (N2T)<sup>13</sup>, Identifiers.org<sup>12</sup>) almost entirely (over 85% of the external registries' records

151 are mapped to a Bioregistry record) while significantly expanding on the content of each of them from a minimum of +81% for  
152 Identifiers.org to a maximum of +6,980% for CHEMINF. The Bioregistry is able to align a smaller proportion of records in  
153 external registries such as FAIRSharing<sup>39</sup> (32.8%), BioPortal<sup>16</sup> (31.3%), Aber-OWL<sup>33</sup> (23.8%), and Wikidata (18.5%) due  
154 to several characteristics of each registry. For example, many records in FAIRSharing<sup>39</sup> do not refer to identifier resources,  
155 Wikidata contains many records lacking a biological scope, and Aber-OWL and BioPortal contain ontologies of heterogeneous  
156 quality which are queued for on-demand inclusion rather than automated ingestion into in the Bioregistry (see Methods).  
157 Despite lower coverage of their entries, the Bioregistry still substantially expands on these external registries between a  
158 minimum of +81% for Aber-OWL to a maximum of +5,624% for EcoPortal<sup>38</sup>.

159 We then investigated the frequency of appearance of each identifier resource in multiple registries (Figure 1B). We found  
160 that only 7 resources appeared in more than 12 of the 20 external registries (including well-known resources such as GO, ChEBI,  
161 and NCBITaxon), and no resource appeared in more than 15, further illustrating the fragmented state of existing registries and  
162 the benefits of an integrative registry in having improved coverage. Further, the Bioregistry contains 159 novel prefixes not  
163 available in any other registry (Figure 1B, green bar). As an example, we examined NCBITaxon, one of the resources that  
164 appears in the largest number of existing registries. This identifier resource appears in 15 external registries under 7 different  
165 prefixes including `taxon`, `taxonomy`, and `NCBITaxon` (Figure 1C). In addition, the Bioregistry curates 9 prefix synonyms  
166 (e.g., `NCBI_Taxon_id`, `uniprot.taxonomy`, `NCBI_taxid`) that appear in various non-registry biomedical resources,  
167 demonstrating the high heterogeneity of usages for a given identifier resource. Such cross-registry mappings and synonyms  
168 in the Bioregistry enable it to act as an interoperability layer to standardize across a large number of external registries and  
169 non-registry resources.

## 170 Web portal for interactive and programmatic use

171 The contents of the Bioregistry can be browsed interactively through the web portal at <https://bioregistry.io>  
172 shown in Figure 2. The portal implements a powerful search feature to help users look up prefixes and CURIEs they  
173 encounter in various databases, ontologies, and other biomedical resources. The search feature extends to not only the  
174 prefix, synonyms, title, and description of each record, but also all of the corresponding fields in linked records from external  
175 registries (Figure 2A). The full prefix list can be browsed (Figure 2B) and each prefix page organizes and contextualizes  
176 all information available from novel curation in the Bioregistry as well as imported from external registries (Figure 2C, D).  
177 Notably, it links to external registry pages when mappings are available. For example, the page for NCBITaxon (<https://bioregistry.io/ncbitaxon>)  
178 links to a large number of external registry pages (Figure 2E). In addition to the data  
179 in the Bioregistry, this page constructs example URIs for first-party providers, third-party providers (e.g., OntoBee<sup>40</sup>, OLS),  
180 and external resolvers (e.g., Identifiers.org, N2T) using a combination of information stored about external registries and  
181 programmatic logic in the underlying Bioregistry Python package (Figure 2F). The web portal provides several other features  
182 including generating pages for each of the external registries integrated into the Bioregistry that show their various properties  
183 and functionalities, facilitating curating and displaying user-generated collections of prefixes such as the list of Semantic Web  
184 prefixes at <https://bioregistry.io/collection/0000002>, and listing contributors. The portal also implements  
185 a resolver that allows for the uniform construction of URIs from CURIEs that are automatically redirected to the appropriate  
186 location based on the URI format string annotated to the CURIE's prefix. The Bioregistry's resolver uses the URI scheme  
187 `https://bioregistry.io/<prefix>:<local-unique-identifier>`, similar to the resolver schemes used by  
188 Identifiers.org and N2T. Bioregistry also makes available a programming language-agnostic RESTful interface that gives access  
189 to all functionality (e.g., search, autocompletion, record retrieval, URI generation) and is documented with OpenAPI/Swagger at  
190 <https://bioregistry.io/apidocs>. The underlying data used to generate each page can be downloaded in a variety  
191 of formats including JSON, YAML, TSV, RDF, and others (where applicable).

192 Finally, the portal serves as a hub for links to the code, data, documentation, and narrative surrounding the Bioregistry.

## 193 Exported artifacts for data integration and reusability

194 The Bioregistry GitHub repository contains the root content of the database (i.e., the registry, metaregistry, and collections) as  
195 JSON files in a version controlled setting, serving as the single source of truth. In addition, it makes available several derived  
196 artifacts that are meant to facilitate integration with downstream systems and resources. These exported artifacts are regenerated  
197 daily, and made available via the web portal at <http://bioregistry.io/download> and are archived on Zenodo at  
198 [doi:10.5281/zenodo.4390079](https://doi.org/10.5281/zenodo.4390079).

199 In addition to the native JSON format, the Bioregistry data is made available as a set of YAML and TSV files to facilitate  
200 reuse. Further, equivalence mappings between resources in external registries are exported into the Simple Standard for Sharing  
201 Ontological Mappings (SSSOM)<sup>26</sup> format. SSSOM is a standard for sharing mappings between different namespaces that we  
202 use to represent mappings between resources appearing in different registries, such as the relations exemplified in Figure 1C.

203 The Bioregistry also provides a number of artifacts to facilitate integration with Semantic Web contexts and linked  
204 open data. First, we constructed an RDF schema for the Bioregistry that reuses elements from common Semantic Web

vocabularies (e.g., DC, FOAF) and creates its own elements in the `bioregistry.schema` vocabulary described at <https://bioregistry.io/schema>. All components of the Bioregistry (i.e., the registry, metaregistry, collections) were jointly exported into RDF under this schema in several commonly used formats including N-Triples, Turtle and JSON-LD. This allows the Bioregistry to be loaded using triple stores (e.g., Virtuoso) or programming libraries (e.g. Python's RDFLib) and subsequently queried with SPARQL. We also assembled a network derived from the RDF export that can be browsed interactively on the Network Data Exchange (NDEX)<sup>41</sup> available at <https://bioregistry.io/ndex:860647c4-f7c1-11ec-ac45-0ac135e8bacf>.

Finally, the Bioregistry makes available several Semantic Web contexts that each map a set of prefixes (e.g., `chebi`) to a corresponding URI prefix (e.g., [http://purl.obolibrary.org/obo/CHEBI\\_](http://purl.obolibrary.org/obo/CHEBI_)). These are derived from the root data using a set of policies for choosing a preferred prefix and URI format for resources in the registry. In addition to a general purpose context encompassing all of Bioregistry, we make available application-specific semantic contexts for integration with the OBO Foundry, and a context limited to prefixes useful for general Semantic Web resources.

### Maintenance model and governance

In contrast to the maintenance and governance structures employed by existing registries, the Bioregistry takes an alternative approach relying on open data, open code, open infrastructure, automated testing, and automated updating. Similar models have been adopted with great success in existing large collaborative projects such as the OBO Foundry. We accomplished this through several steps. First, the Bioregistry data is stored and versioned using GitHub (see Methods). Second, anyone can propose additions or changes either directly by submitting a pull request to the Bioregistry repository or by filling out an appropriate issue template that triggers an automated generation of a pull request. Both create an open forum for discussion that invites a wide variety of stakeholders to engage (implementation details in Methods). Third, using GitHub allows for the technical implementation of quality control and quality assurance workflows that are coupled to pull requests in order to ensure that all changes meet a predefined set of standards, which are described explicitly and publicly in the contribution guidelines<sup>1</sup> as well as implicitly in the implementation of the quality assurance workflow. In addition to the open data, open code, open infrastructure philosophy, the Bioregistry project has sought out community guidance on how to establish a governance model that is more robust to the fluctuation of funding and personnel who are actively working on and moderating the project. This has resulted in the establishment of a Review Team and a Development Team as well as a public minimal governance model<sup>2</sup> that describes how to induct new members, how to remove members, who respectively has the technical authority and community responsibility to facilitate and ultimately judge changes to the underlying database and make changes to the code base, and how to improve the governance model over time. These teams have been initially seeded with members from diverse scientific backgrounds, locations, and institutions to further promote the durability of the project. These guidelines also include a liberal policy on authorship to further demonstrate the project's commitment to inclusivity.

## 3 Use cases and integrations

Here, we highlight several projects and standards that have already adopted various functionalities of the Bioregistry.

### Supporting Interoperable Data Annotation

Several projects use the Bioregistry to create *prefix maps*, or mappings between prefixes (e.g., `uniprot`) and their corresponding URI prefixes (e.g., <https://www.uniprot.org/uniprot/>). These support the interoperability of data annotations and the conversion between URIs and CURIEs in Semantic Web applications. The Simple Standard for Sharing Ontological Mappings (SSSOM)<sup>26</sup> is a metadata standard for various mappings (e.g., equivalences) between ontology and database terms and an associated toolset (<https://github.com/mapping-commons/sssom-py>) based on LinkML (<https://linkml.io>) for loading, validating, and converting SSSOM content. The standard is meant to encourage higher quality curation in biomedical ontologies which often lack important metadata such as the mapping type, a standardized prefix and local unique identifier for the subject and object terms, provenance about how the mapping was generated, and provenance about who generated the mapping. The default prefix map used in validation is generated by the Bioregistry following the procedure described in Supplementary Section 6.1.

Manubot<sup>24</sup> is a tool for open collaborative writing that aims to bring automation, customizability, and transparency to scholarly publishing. With Manubot, users write manuscripts using markdown with special support for citation by persistent identifiers represented as CURIEs such as `[@doi:10.1371/journal.pcbi.1007128]` (which can then be automatically turned into a full citation). Embedding CURIEs in manuscripts is especially valuable when referring to resources that are not citable manuscripts such as clinical trials (e.g., in a review of COVID-19<sup>42</sup>). Manubot initially added support for 700 CURIE prefixes by incorporating Identifiers.org but later switched to the Bioregistry which at the time added support

<sup>1</sup><https://github.com/biopragmatics/bioregistry/blob/main/docs/CONTRIBUTING.md>

<sup>2</sup><https://github.com/biopragmatics/bioregistry/blob/main/docs/GOVERNANCE.md>

255 for an additional 365 prefixes. Besides being more comprehensive, the Bioregistry's open contribution model allowed for  
256 addressing several longstanding issues with Identifiers.org including invalid regular expression patterns, missing prefixes, as  
257 well as inconsistencies due to some namespaces being redundantly embedded in identifiers.

258 We discuss the plans and considerations for adopting the Bioregistry for interoperable data annotation in further software  
259 and resources including the Biolink Model<sup>35</sup> and the Alliance of Genome Resources<sup>43</sup> in Supplementary Section 7.

## 260 **Validation and Quality Control of Entity References**

261 Several projects use the Bioregistry to standardize or validate prefixes and local unique identifiers and promote interoperability  
262 and reusability. Biomappings<sup>25</sup> (<https://github.com/biopragmatics/biomappings>) is a repository for curated  
263 and predicted mappings between equivalent (or otherwise related) biomedical entities in different identifier resources. It  
264 contains several workflows for generating predicted mappings using Gilda<sup>44</sup> and provides a web-based curation interface for  
265 reviewing predicted mappings and adding novel ones. Biomappings ensures data integrity by validating all prefixes and local  
266 unique identifiers in the repository using the Bioregistry. Further, the curation interface uses the Bioregistry to generate links to  
267 a web page describing each biomedical entity, making curation easier. Biomappings also generates a web-based summary of its  
268 content that uses the Bioregistry to provide links to identifier resources and to resolve CURIEs.

269 The Integrated Network and Dynamical Reasoning Assembler (INDRA)<sup>27</sup> assembles biomedical knowledge from multiple  
270 databases combined with text mining of scientific publications to construct executable models. When performing assembly,  
271 INDRA maintains references to biomedical entities that are grounded to one or more identifier resources. It uses the Bioregistry  
272 to first check that the prefixes used in these groundings are standardized, and then to validate the associated unique local  
273 identifier according to the pattern provided by the Bioregistry. This validation is critical for maintaining consistency in INDRA's  
274 automated assembly workflows.

275 The Phenotype Knowledge Translator (PheKnowLator)<sup>23</sup> ecosystem constructs FAIR biomedical knowledge graphs using  
276 ontologies and reasoning with the addition of non-ontological data sources. PheKnowLator uses the Bioregistry to standardize  
277 references in CURIEs and URIs from both data types to provide semantically consistent results for downstream use cases. The  
278 Bioregistry helps overcome significant challenges posed by ontologies (e.g., changing namespaces over time, data that is not  
279 from an ontology that does not provide valid namespaces or URIs), and their integration. The Bioregistry API has become  
280 a vital component of the build process and is used to standardize URIs for all entities and triples. It has also provided new  
281 opportunities to extend PheKnowLator's testing harness. Overall, the inclusion of Bioregistry has improved the PheKnowLator  
282 Ecosystem and the knowledge graphs it produces.

## 283 **Contextualizing Entities with Website Links**

284 Several projects use the Bioregistry to generate and resolve URIs within their APIs or user-facing websites in order to provide  
285 additional context to the entities they reference. BridgeDb<sup>22</sup> is a web service that maps between local unique identifiers from  
286 different identifier resources representing equivalent entities (e.g., P0DP23 in UniProt Q17855525 and in Wikidata for the  
287 Calmodulin-1 protein). The Bioregistry has been integrated in BridgeDb's Java and R clients as well as Bacting<sup>45</sup> to enable  
288 lookup based on standardized CURIEs, to enable creating internal BridgeDb identifier objects *via* standardized CURIEs, and to  
289 generate URIs resolvable through the Bioregistry web application.

290 The Bioregistry has also been used in several websites to generate URLs for human genes, protein complexes, and other  
291 entities. For example, the DUB Portal<sup>46</sup> is a website summarizing experimental analyses of deubiquitinating enzymes and  
292 uses the Bioregistry to link to human genes in HGNC and protein families in the FamPlex vocabulary<sup>47</sup>. The website for  
293 FamPlex<sup>3</sup> also uses the Bioregistry to standardize and link references for human genes; equivalence mappings to InterPro<sup>48</sup>,  
294 Medical Subject Headings (MeSH)<sup>49</sup>, GO, Complex Portal<sup>50</sup>, NextProt<sup>51</sup> for protein families and complexes; and references  
295 for publications in PubMed and PubMed Central. Similarly, the interactive user interface for the BERN2<sup>52</sup> named entity  
296 recognition platform standardizes its biomedical entities and generates links using the Bioregistry.

## 297 **Unified Access to External Registries**

298 Because of its integration of external registries, the Bioregistry is also useful for unified access to their respective data. The OBO  
299 Foundry<sup>19</sup> facilitates the coordinated development of biomedical ontologies through a set of guiding principles and community  
300 organization. Its associated repository (<https://github.com/OBOFoundry/OBOFoundry.github.io>) stores the  
301 structured metadata about each ontology, including their preferred prefix, title, homepage, description, and usages. The  
302 Bioregistry is used to support the standardization and maintenance of this metadata in several ways described in detail in  
303 Supplementary Section 6.2.

---

<sup>3</sup><https://sorgerlab.github.io/famplex>

## 304 4 Discussion

305 We presented the Bioregistry, an integrative registry of biomedical identifier resources. The Bioregistry takes a novel approach  
306 to curation by importing and harmonizing data from external registries that can be further improved and extended with novel  
307 curation. It relies on an open data, open code, open infrastructure philosophy combined with a novel governance strategy to  
308 foster community contributions and engagement, and ensure its longevity and adoption. It uses public infrastructure for quality  
309 assurance, distribution, and deployment to promote transparency, reduce cost, and uncouple its long-term maintenance from a  
310 specific institution, funding source, or group of maintainers. While the Bioregistry demonstrates higher coverage and metadata  
311 granularity than other registries, it also explicitly encourages reuse and redistribution via its highly permissive CC0 license.

### 312 Limitations

313 Entries in the Bioregistry that represent identifier resources, their preferred CURIE prefix, and other metadata are integrated  
314 semi-automatically from external registries (such as Identifiers.org and Name-to-Thing (N2T)<sup>13</sup>) or manually curated directly  
315 in the Bioregistry. The design choice that the Bioregistry semi-automatically imports and aligns content from external registries  
316 is important for maintaining broad coverage, and to distribute curation effort across multiple projects. However, this still poses  
317 challenges for consistency. Namely, the Bioregistry has limited ability to enforce guidelines and conventions in other registries.  
318 For instance, there are differing views in the community on stylistic choices in the capitalization of preferred CURIE prefixes  
319 (e.g., *chebi* vs CHEBI or ChEBI) for identifier resources. Drawing on other registries can also lead to future conflicts where  
320 multiple registries choose the same CURIE prefix for two different identifier resources, creating a situation that has to be  
321 retroactively arbitrated in the Bioregistry (an example is given in Supplementary Section 5.2). Nevertheless, the Bioregistry  
322 maintains guidelines<sup>4</sup> for creating new identifier resource prefixes, which, if followed, can mitigate these issues. Further, the  
323 purview of the Bioregistry does not extend to directly advising and mentoring creators of new identifier resources to make  
324 good choices in their identifier schemes. Creators of such resources can rely on recommendations such as those suggested by  
325 McMurry *et al.* (2017)<sup>6</sup>.

326 Adopting the Bioregistry's standard for prefixes, CURIEs, and URIs in a new resource is straightforward. However, applying  
327 it retroactively to an existing resource can pose challenges. It may require updating the data and associated code in the resource  
328 itself as well as in downstream consumers of the resource. This can manifest in several ways, including updating non-standard  
329 synonyms (e.g. many ontologies use MSH as a non-standard prefix for MeSH), updating non-standard construction of CURIEs  
330 (e.g., using redundant prefixes as prescribed by Identifiers.org like in GO:GO:0006915), or updating non-standard URIs (e.g.,  
331 switching all ORCID URIs to use the *https* protocol). If such changes are not feasible in the resource, it is still possible to  
332 implement mappings to the Bioregistry or create custom exports following the Bioregistry standard, potentially broadening the  
333 resource's interoperability.

334 The Bioregistry provides a solution for standardizing references to individual entries in identifiers resources. However,  
335 it is often the case that multiple identifiers resources contain entries representing equivalent entities (e.g., multiple disease  
336 ontologies representing the same disease) leading to redundancy when integrating disparate resources, such as when constructing  
337 knowledge graphs. Determining which identifier resource to prioritize when representing an entity that appears in multiple  
338 resources is beyond the scope of the Bioregistry. Nevertheless, the Bioregistry can contribute to the standardization of the cross-  
339 references between equivalent entities in different identifiers resources (cross-references, in practice, often use non-standard  
340 CURIEs and URIs) thereby helping redundancy resolution among them.

341 While the Bioregistry is limited to resources of interest to researchers in the life sciences, its methodology and technological  
342 implementation could extend to other scientific areas. Ultimately, the Bioregistry could serve as a template for the creation  
343 of domain-specific metaregistries in other areas or be the basis for the creation of a metaregistry spanning multiple scientific  
344 domains.

### 345 Future Work on the Bioregistry

346 Following the initial development, deployment, and early adoption of the Bioregistry, two ongoing challenges remain. The  
347 first is to be responsive in the maintenance, enrichment, and extension of the content in the registry to best reflect the reality  
348 of the ever-changing landscape of biomedical identifier resources. While this has not been realized by previous registries,  
349 the Bioregistry's combination of technical infrastructure and governance model will enable this effort in a sustainable way.  
350 The second is to build and maintain a community of users. This entails continuing to engage multiple groups of users and  
351 stakeholders. This includes curators, and consumers of biomedical resources, as well as groups designing automated data- or  
352 knowledge-extraction and aggregation systems. Serving the needs of these communities requires identifying their challenges,  
353 and improving the Bioregistry's data model, tooling, and content accordingly. It also entails facilitating discussion between a  
354 diverse set of individuals and offering training for usage of the Bioregistry and its philosophy. To this end, the authors plan to

<sup>4</sup><https://github.com/biopragmatics/bioregistry/blob/main/docs/CONTRIBUTING.md#submitting-new-prefixes>



355 organize a set of recurring community workshops (following an initial workshop held in 2021<sup>5</sup>) around the topics of identifier  
356 resources and registries.

## 357 **Future Vision**

358 We envision the Bioregistry could more broadly be used to promote and support the standardized annotation of data, models,  
359 ontologies, and scientific literature. First, the growing body of data being made available through publications and data  
360 repositories often lack standardized annotations to their records (e.g., columns in a table). If adopted, the Bioregistry could  
361 provide a consistent way of annotating these data to make them more FAIR, especially facilitating reuse.

362 Second, we envision the Bioregistry promoting and supporting the standardization of structured metadata associated with  
363 models and networks derived from data such as mechanistic models (e.g., in the BioModels database<sup>53</sup>), network-based models  
364 (e.g., in Network Data Exchange (NDEx)<sup>41</sup>), knowledge graphs (e.g., those described in<sup>54</sup>), and machine learning models in  
365 order to promote their interoperability and reuse. This vision aligns well with the recommendations from a recent assessment of  
366 the reproducibility of such models<sup>55</sup> that highlighted the more general importance of annotation using high-quality controlled  
367 vocabularies like GO and ChEBI.

368 Third, though biomedical ontologies have proven invaluable for data annotation, key ontologies still suffer from a lack  
369 of standardization of cross-references<sup>19</sup>, making it difficult to merge and reason across ontologies and other structured data  
370 sources. Given that ontologies are often curated in public version-controlled repositories in standardized formats (e.g., OBO,  
371 OWL), the Bioregistry could be used to support their semi-automated standardization and maintenance in order to both reduce  
372 curation burden and potentiate their value in data integration scenarios.

373 Finally, we envision the potential adoption of the Bioregistry by academic publishers to support the standardized annotation  
374 of named entities in the text provided by authors (e.g., with BioFactoid<sup>56</sup>), and thereby decrease the need for doing expensive  
375 and error-prone post-processing like automated named entity recognition on publications to create structured representations.

## 376 **Methods**

377 The Bioregistry repository tightly couples the data to a Python package that facilitates loading, accessing, and modifying the  
378 root data files. It provides several high-level data structures and workflows for accessing and reasoning over the Bioregistry  
379 and external registries' integrated data, that support the quality assurance workflows (described above), the web application  
380 (described above), the alignment workflows (described below), the generation of derived artifacts (described above) and other  
381 user-facing functionality such as prefix standardization, CURIE standardization, and URI parsing. Full documentation for the  
382 Python software package can be found at <https://bioregistry.readthedocs.io>.

## 383 **Alignment**

384 While manual curation of mappings to external registries is feasible when adding novel prefixes to the Bioregistry, the frequency  
385 of updates to external registries motivated the development and application of periodic automated and semi-automated alignment.  
386 We first stratify all external registries into three categories based on their available metadata, biomedical scope, focus on  
387 assigning global prefixes to resources, and governance. The first group with metadata availability, a biomedical scope, and focus  
388 on assigning global prefixes contains the Identifiers.org, the OBO Foundry, OLS, N2T. The second group contains registries  
389 such as GO, NCBI, UniProt, Cellosaurus, and FAIRSharing that contain entries that do not correspond to identifier spaces  
390 which are excluded from the import. It additionally included registries like BioContext and BioPortal because of insufficient  
391 metadata that often made it impossible to determine what identifier resource the metadata refers to. The third group contains  
392 registries with minimal metadata or lack of biomedical focus such as Prefix.cc. The alignment algorithm first generates a lookup  
393 table based on the canonical prefix, preferred prefix, and all prefix synonyms (see Supplementary Section 3 for details on the  
394 data model) for each resource in the Bioregistry. The prefix policies and automated quality assurance checks in the Bioregistry  
395 ensure that there are no collisions in this lookup table. For each external registry, the data are downloaded, normalized, and  
396 exactly one field is annotated as the external prefix. All Bioregistry prefixes that already have been mapped to an external prefix  
397 in the external registry are removed from the lookup table. Similarly, all external prefixes that already have mappings are not  
398 considered for new mappings. Each external prefix that matches an entry in the lookup table is assigned an automated mapping.  
399 A manually curated list of incorrect mappings and collisions are used to post-process the automated mappings and remove false  
400 negative mappings (see Supplementary Section 5.2). External prefixes that could not be mapped to a Bioregistry prefix are  
401 handled based on their stratification. For the first group of registries, the prefix is added as a new record to the Bioregistry. For  
402 the second group of registries, the prefix is added to a curation sheet along with its relevant metadata (e.g., title, homepage,  
403 example identifier) for later manual curation. For the third group of registries with minimal metadata, no report is made.

---

<sup>5</sup><https://biopragmatics.github.io/workshops/WPCI2021.html>

## 404 Promoting sustainability and longevity through automation

405 The Bioregistry is hosted on GitHub (<https://github.com/biopragmatics/bioregistry>) to take advantage of  
406 its public, cloud-based version control, collaboration, and workflow management platforms. The single source of truth data (i.e.,  
407 root data) for the Bioregistry is stored in version control. This implicitly versions all minor changes with git commit hashes and  
408 allows git tags to be used to mediate releases, which are automatically archived and re-distributed on both GitHub and Zenodo  
409 (<https://zenodo.org>).

410 The Bioregistry uses GitHub Actions as a continuous integration service to run code and data quality assurance to  
411 promote the maintainability and integrity of the resource (see Supplementary Section 4.1). They further enable workflows  
412 for automatically generating pull requests and notifying reviewers to enable non-technical users to make submissions to  
413 the resource. The Bioregistry further uses GitHub Actions as a continuous delivery and continuous deployment system to  
414 run the aforementioned alignment workflows, generate derived artifacts, release code to the Python Package Index (PyPI),  
415 containerize code on Docker Hub (<https://hub.docker.com>), deploy the web application to Amazon Web Services  
416 (<https://aws.amazon.com>) on a daily basis (see Supplementary Section 4.2). Combined, the continuous integration,  
417 delivery, and deployment services allow contributors and consumers of the Bioregistry to more easily propose improvements,  
418 review them as a community, and see them reflected in the data and website without the need for manual intervention by the  
419 project team. Using an entirely free, public, and open public infrastructure to do so promotes longevity and sustainability by  
420 mitigating the monetary requirements. Further, the technical requirements of the deployment of the web service and hosting are  
421 also minimized such that hosting costs around 33\$/year and compute costs around 27\$/year (see Supplementary Section 4.3).

## 422 Code availability

423 The source code and data for the Bioregistry are available under the MIT and CC0 Licenses at [https://github.com/](https://github.com/biopragmatics/bioregistry)  
424 [biopragmatics/bioregistry](https://github.com/biopragmatics/bioregistry).

## 425 References

- 426 1. Wilkinson, M. D. *et al.* The FAIR Guiding Principles for scientific data management and stewardship. *Sci. Data* **3**, 160018,  
427 [10.1038/sdata.2016.18](https://doi.org/10.1038/sdata.2016.18) (2016).
- 428 2. Jacobsen, A. *et al.* FAIR Principles: Interpretations and Implementation Considerations. *Data Intell.* **2**, 10–29, [10.1162/](https://doi.org/10.1162/dint_r_00024)  
429 [dint\\_r\\_00024](https://doi.org/10.1162/dint_r_00024) (2020).
- 430 3. Wilson, S. L. *et al.* Sharing biological data: why, when, and how. *FEBS Lett.* **595**, 847–863, [https://doi.org/10.1002/](https://doi.org/10.1002/1873-3468.14067)  
431 [1873-3468.14067](https://doi.org/10.1002/1873-3468.14067) (2021). <https://febs.onlinelibrary.wiley.com/doi/pdf/10.1002/1873-3468.14067>.
- 432 4. Hastings, J. *et al.* ChEBI in 2016: Improved services and an expanding collection of metabolites. *Nucleic Acids Res.* **44**,  
433 D1214–D1219, [10.1093/nar/gkv1031](https://doi.org/10.1093/nar/gkv1031) (2016).
- 434 5. Bateman, A. *et al.* UniProt: the universal protein knowledgebase in 2021. *Nucleic Acids Res.* **49**, D480–D489, [10.1093/](https://doi.org/10.1093/nar/gkaa1100)  
435 [nar/gkaa1100](https://doi.org/10.1093/nar/gkaa1100) (2021).
- 436 6. McMurry, J. A. *et al.* Identifiers for the 21st century: How to design, provision, and reuse persistent identifiers to maximize  
437 utility and impact of life science data. *PLoS Biol.* **15**, 1–18, [10.1371/journal.pbio.2001414](https://doi.org/10.1371/journal.pbio.2001414) (2017).
- 438 7. Tweedie, S. *et al.* Genenames.org: the HGNC and VGNC resources in 2021. *Nucleic Acids Res.* **49**, D939–D946,  
439 [10.1093/nar/gkaa980](https://doi.org/10.1093/nar/gkaa980) (2021).
- 440 8. Bansal, P. *et al.* Rhea, the reaction knowledgebase in 2022. *Nucleic Acids Res.* **50**, D693–D700, [10.1093/nar/gkab1016](https://doi.org/10.1093/nar/gkab1016)  
441 (2022).
- 442 9. Barrett, A. J. Enzyme Nomenclature. Recommendations 1992. *Eur. J. Biochem.* **232**, 1, [https://doi.org/10.1111/j.1432-1033.](https://doi.org/10.1111/j.1432-1033.1995.tb20774.x)  
443 [1995.tb20774.x](https://doi.org/10.1111/j.1432-1033.1995.tb20774.x) (1995).
- 444 10. The Gene Ontology Consortium. The Gene Ontology Resource: 20 years and still GOing strong. *Nucleic Acids Res.* **47**,  
445 D330–D338, [10.1093/nar/gky1055](https://doi.org/10.1093/nar/gky1055) (2019).
- 446 11. Fleischmann, A. *et al.* IntEnz, the integrated relational enzyme database. *Nucleic Acids Res.* **32**, D434–D437, [10.1093/nar/](https://doi.org/10.1093/nar/gkh119)  
447 [gkh119](https://doi.org/10.1093/nar/gkh119) (2004).
- 448 12. Juty, N., Le Novere, N. & Laibe, C. Identifiers.org and MIRIAM Registry: Community resources to provide persistent  
449 identification. *Nucleic Acids Res.* **40**, 580–586, [10.1093/nar/gkr1097](https://doi.org/10.1093/nar/gkr1097) (2012).
- 450 13. Wimalaratne, S. M. *et al.* Uniform resolution of compact identifiers for biomedical data. *Sci. Data* **5**, 1–8, [10.1038/sdata.](https://doi.org/10.1038/sdata.2018.29)  
451 [2018.29](https://doi.org/10.1038/sdata.2018.29) (2018).

- 452 **14.** McMurry, J. & Kunze, J. Prefix commons. <https://github.com/prefixcommons/biocontext> (2017).
- 453 **15.** Schoch, C. L. *et al.* NCBI Taxonomy: a comprehensive update on curation, resources and tools. *Database* **2020**, baaa062,  
454 [10.1093/database/baaa062](https://doi.org/10.1093/database/baaa062) (2020).
- 455 **16.** Whetzel, P. L. *et al.* BioPortal: enhanced functionality via new Web services from the National Center for Biomedical  
456 Ontology to access and use ontologies in software applications. *Nucleic Acids Res.* **39**, W541–5, [10.1093/nar/gkr469](https://doi.org/10.1093/nar/gkr469)  
457 (2011).
- 458 **17.** Bairoch, A. The Cellosaurus, a Cell-Line Knowledge Resource. *J. Biomol. Tech.* **29**, 25–38, [10.7171/jbt.18-2902-002](https://doi.org/10.7171/jbt.18-2902-002)  
459 (2018).
- 460 **18.** Clark, K., Karsch-Mizrachi, I., Lipman, D. J., Ostell, J. & Sayers, E. W. GenBank. *Nucleic Acids Res.* **44**, D67–72,  
461 [10.1093/nar/gkv1276](https://doi.org/10.1093/nar/gkv1276) (2016).
- 462 **19.** Jackson, R. C. *et al.* OBO Foundry in 2021: Operationalizing Open Data Principles to Evaluate Ontologies. *Database*  
463 (*Oxford*). **2021**, 1–9, [10.1093/database/baab069](https://doi.org/10.1093/database/baab069) (2021).
- 464 **20.** Cote, R., Jones, P., Apweiler, R. & Hermjakob, H. The Ontology Lookup Service, a lightweight cross-platform tool for  
465 controlled vocabulary queries. *BMC Bioinforma.* **7**, 1–7, [10.1186/1471-2105-7-97](https://doi.org/10.1186/1471-2105-7-97) (2006).
- 466 **21.** Mungall, C. *et al.* prefixcommons/biocontext: v0.1.0, [10.5281/zenodo.6800248](https://doi.org/10.5281/zenodo.6800248) (2022).
- 467 **22.** van Iersel, M. P. *et al.* The BridgeDb framework: Standardized access to gene, protein and metabolite identifier mapping  
468 services. *BMC Bioinforma.* **11**, [10.1186/1471-2105-11-5](https://doi.org/10.1186/1471-2105-11-5) (2010).
- 469 **23.** Callahan, T. J., Tripodi, I. J., Hunter, L. E. & Baumgartner, W. A. A framework for automated construction of heterogeneous  
470 large-scale biomedical knowledge graphs. *bioRxiv* [10.1101/2020.04.30.071407](https://doi.org/10.1101/2020.04.30.071407) (2020). [https://www.biorxiv.org/content/  
471 early/2020/05/02/2020.04.30.071407.full.pdf](https://www.biorxiv.org/content/early/2020/05/02/2020.04.30.071407.full.pdf).
- 472 **24.** Himmelstein, D. S. *et al.* Open collaborative writing with Manubot. *PLoS Comput. Biol.* **15**, e1007128, [10.1371/journal.  
473 pcbi.1007128](https://doi.org/10.1371/journal.pcbi.1007128) (2019).
- 474 **25.** Hoyt, C. T., Hoyt, A. & Gyori, B. M. Biomappings, [10.5281/zenodo.4323555](https://doi.org/10.5281/zenodo.4323555) (2021).
- 475 **26.** Matentzoglou, N. *et al.* A Simple Standard for Sharing Ontological Mappings (SSSOM). *Database* **2022**, baac035,  
476 [10.1093/database/baac035](https://doi.org/10.1093/database/baac035) (2022).
- 477 **27.** Gyori, B. M. *et al.* From word models to executable models of signaling networks using automated assembly. *Mol. Syst.*  
478 *Biol.* **13**, 954, [10.15252/msb.20177651](https://doi.org/10.15252/msb.20177651) (2017).
- 479 **28.** Hoyt, C. T. biopragmatics/bioregistry, [10.5281/zenodo.4390079](https://doi.org/10.5281/zenodo.4390079).
- 480 **29.** Gray, K. A., Seal, R. L., Tweedie, S., Wright, M. W. & Bruford, E. A. A review of the new HGNC gene family resource.  
481 *Hum. Genomics* **10**, 6, [10.1186/s40246-016-0062-6](https://doi.org/10.1186/s40246-016-0062-6) (2016).
- 482 **30.** Eschmeyer, W. & of Sciences, C. A. *Catalog of Fishes*. No. v. 4 in California Academy of Sciences. Center for Biodiversity  
483 Research and Information. 1 (California Academy of Sciences, 1998).
- 484 **31.** Midford, P. *et al.* The Teleost Taxonomy Ontology. *Nat. Preced.* [10.1038/npre.2010.4629.1](https://doi.org/10.1038/npre.2010.4629.1) (2010).
- 485 **32.** Midford, P. E. *et al.* The vertebrate taxonomy ontology: a framework for reasoning across model organism and species  
486 phenotypes. *J. Biomed. Semant.* **4**, 34, [10.1186/2041-1480-4-34](https://doi.org/10.1186/2041-1480-4-34) (2013).
- 487 **33.** Hoehndorf, R., Slater, L., Schofield, P. N. & Gkoutos, G. V. Aber-OWL: a framework for ontology-based data access in  
488 biology. *BMC Bioinforma.* **16**, 26, [10.1186/s12859-015-0456-9](https://doi.org/10.1186/s12859-015-0456-9) (2015).
- 489 **34.** Jonquet, C. *et al.* AgroPortal: A vocabulary and ontology repository for agronomy. *Comput. Electron. Agric.* **144**, 126–143,  
490 <https://doi.org/10.1016/j.compag.2017.10.012> (2018).
- 491 **35.** Unni, D. R. *et al.* Biolink Model: A universal schema for knowledge graphs in clinical, biomedical, and translational  
492 science. *Clin. Transl. Sci.* <https://doi.org/10.1111/cts.13302> (2022).
- 493 **36.** Hastings, J. *et al.* The chemical information ontology: Provenance and disambiguation for chemical data on the biological  
494 semantic web. *PLOS ONE* **6**, 1–13, [10.1371/journal.pone.0025513](https://doi.org/10.1371/journal.pone.0025513) (2011).
- 495 **37.** Arnaud, E. *et al.* The Ontologies Community of Practice: A CGIAR Initiative for Big Data in Agrifood Systems. *Patterns*  
496 **1**, 100105, <https://doi.org/10.1016/j.patter.2020.100105> (2020).
- 497 **38.** Kechagioglou, X., Vaira, L., Tomassino, P., Fiore, N. & Basset, A. EcoPortal : An Environment for FAIR Semantic  
498 Resources in the Ecological Domain. In *JOWO* (Bolzano, Italy, 2021).

- 499 **39.** Sansone, S.-A. *et al.* FAIRsharing as a community approach to standards, repositories and policies. *Nat. Biotechnol.* **37**,  
500 358–367, [10.1038/s41587-019-0080-8](https://doi.org/10.1038/s41587-019-0080-8) (2019).
- 501 **40.** Ong, E. *et al.* Ontobee: A linked ontology data server to support ontology term dereferencing, linkage, query and  
502 integration. *Nucleic Acids Res.* **45**, D347–D352, [10.1093/nar/gkw918](https://doi.org/10.1093/nar/gkw918) (2017).
- 503 **41.** Pratt, D. *et al.* NDEX, the Network Data Exchange. *Cell Syst.* **1**, 302–305, [10.1016/j.cels.2015.10.001](https://doi.org/10.1016/j.cels.2015.10.001) (2015).
- 504 **42.** Rando, H. M. *et al.* An Open-Publishing Response to the COVID-19 Infodemic. (2021).
- 505 **43.** Kishore, R. *et al.* Automated generation of gene summaries at the Alliance of Genome Resources. *Database* **2020**, baaa037,  
506 [10.1093/database/baaa037](https://doi.org/10.1093/database/baaa037) (2020).
- 507 **44.** Gyori, B. M., Hoyt, C. T. & Steppi, A. Gilda: biomedical entity text normalization with machine-learned disambiguation as a  
508 service. *Bioinforma. Adv.* **2**, [10.1093/bioadv/vbac034](https://doi.org/10.1093/bioadv/vbac034) (2022). Vbac034, [https://academic.oup.com/bioinformaticsadvances/  
509 article-pdf/2/1/vbac034/43775895/vbac034.pdf](https://academic.oup.com/bioinformaticsadvances/article-pdf/2/1/vbac034/43775895/vbac034.pdf).
- 510 **45.** Willighagen, E. Bacting : a next generation , command line version of Bioclipse Statement of Need. *J. Open Source Softw.*  
511 **6**, 1–5, [10.21105/joss.02558](https://doi.org/10.21105/joss.02558) (2021).
- 512 **46.** Doherty, L. M. *et al.* Integrating multi-omics data reveals function and therapeutic potential of deubiquitinating enzymes.  
513 *eLife* **11**, e72879, [10.7554/eLife.72879](https://doi.org/10.7554/eLife.72879) (2022).
- 514 **47.** Bachman, J. A., Gyori, B. M. & Sorger, P. K. FamPlex: A resource for entity recognition and relationship resolution of  
515 human protein families and complexes in biomedical text mining. *BMC Bioinforma.* **19**, 1–14, [10.1186/s12859-018-2211-5](https://doi.org/10.1186/s12859-018-2211-5)  
516 (2018).
- 517 **48.** Mulder, N. J. *et al.* InterPro, progress and status in 2005. *Nucleic Acids Res.* **33**, D201–D205, [10.1093/nar/gki106](https://doi.org/10.1093/nar/gki106) (2005).  
518 [https://academic.oup.com/nar/article-pdf/33/suppl\\_1/D201/7622281/gki106.pdf](https://academic.oup.com/nar/article-pdf/33/suppl_1/D201/7622281/gki106.pdf).
- 519 **49.** Rogers, F. B. Medical subject headings. *Bull. Med. Libr. Assoc.* **51**, 114–6 (1963).
- 520 **50.** Meldal, B. H. *et al.* The complex portal - An encyclopaedia of macromolecular complexes. *Nucleic Acids Res.* **43**,  
521 D479–D484, [10.1093/nar/gku975](https://doi.org/10.1093/nar/gku975) (2015).
- 522 **51.** Zahn-Zabal, M. *et al.* The neXtProt knowledgebase in 2020: data, tools and usability improvements. *Nucleic Acids Res.* **48**,  
523 D328–D334, [10.1093/nar/gkz995](https://doi.org/10.1093/nar/gkz995) (2019). <https://academic.oup.com/nar/article-pdf/48/D1/D328/31697996/gkz995.pdf>.
- 524 **52.** Sung, M. *et al.* Bern2: an advanced neural biomedical namedentity recognition and normalization tool. *arXiv* (2022).  
525 [2201.02080](https://arxiv.org/abs/2201.02080).
- 526 **53.** Malik-Sheriff, R. S. *et al.* BioModels — 15 years of sharing computational models in life science. *Nucleic Acids Res.* **48**,  
527 D407–D415, [10.1093/nar/gkz1055](https://doi.org/10.1093/nar/gkz1055) (2020). Gkz1055, [https://academic.oup.com/nar/article-pdf/48/D1/D407/31698010/  
528 gkz1055.pdf](https://academic.oup.com/nar/article-pdf/48/D1/D407/31698010/gkz1055.pdf).
- 529 **54.** Bonner, S. *et al.* A review of biomedical datasets relating to drug discovery: A knowledge graph perspective. *CoRR*  
530 **abs/2102.10062** (2021). [2102.10062](https://arxiv.org/abs/2102.10062).
- 531 **55.** Tiwari, K. *et al.* Reproducibility in systems biology modelling. *Mol. Syst. Biol.* **17**, e9982, [https://doi.org/10.15252/msb.  
532 20209982](https://doi.org/10.15252/msb.20209982) (2021).
- 533 **56.** Wong, J. V. *et al.* Science Forum: Author-sourced capture of pathway knowledge in computable form using Biofactoid.  
534 *Elife* **10**, e68292, [10.7554/eLife.68292](https://doi.org/10.7554/eLife.68292) (2021).

## 535 Acknowledgements

536 CTH, KK, BMG were funded under the Defense Advanced Research Projects Agency (DARPA) Young Faculty Award  
537 [W911NF-20-1-0255]. EW received funding by NWO grant [203.001.121].

## 538 Author contributions statement

539 CTH and BMG conceived and implemented the software and resource, analyzed the results, and wrote the manuscript. CJM,  
540 JK, JM, and MAH contributed to the conception and design of the resource and software. AR, BMG, CTH, CJM, DDF, DSH,  
541 DW, MB, NM, SM, TL, and TJC performed data curation for the resource, BMG, CTH, DRU, EW, HBH, KK, NM, and SM  
542 contributed to the software. CJM, DSH, DRU, EW, JM, NM, SM, TJC co-wrote the manuscript. All authors reviewed and  
543 edited the manuscript.

## 544 Competing interests

545 DDF received salary from Enveda Biosciences.

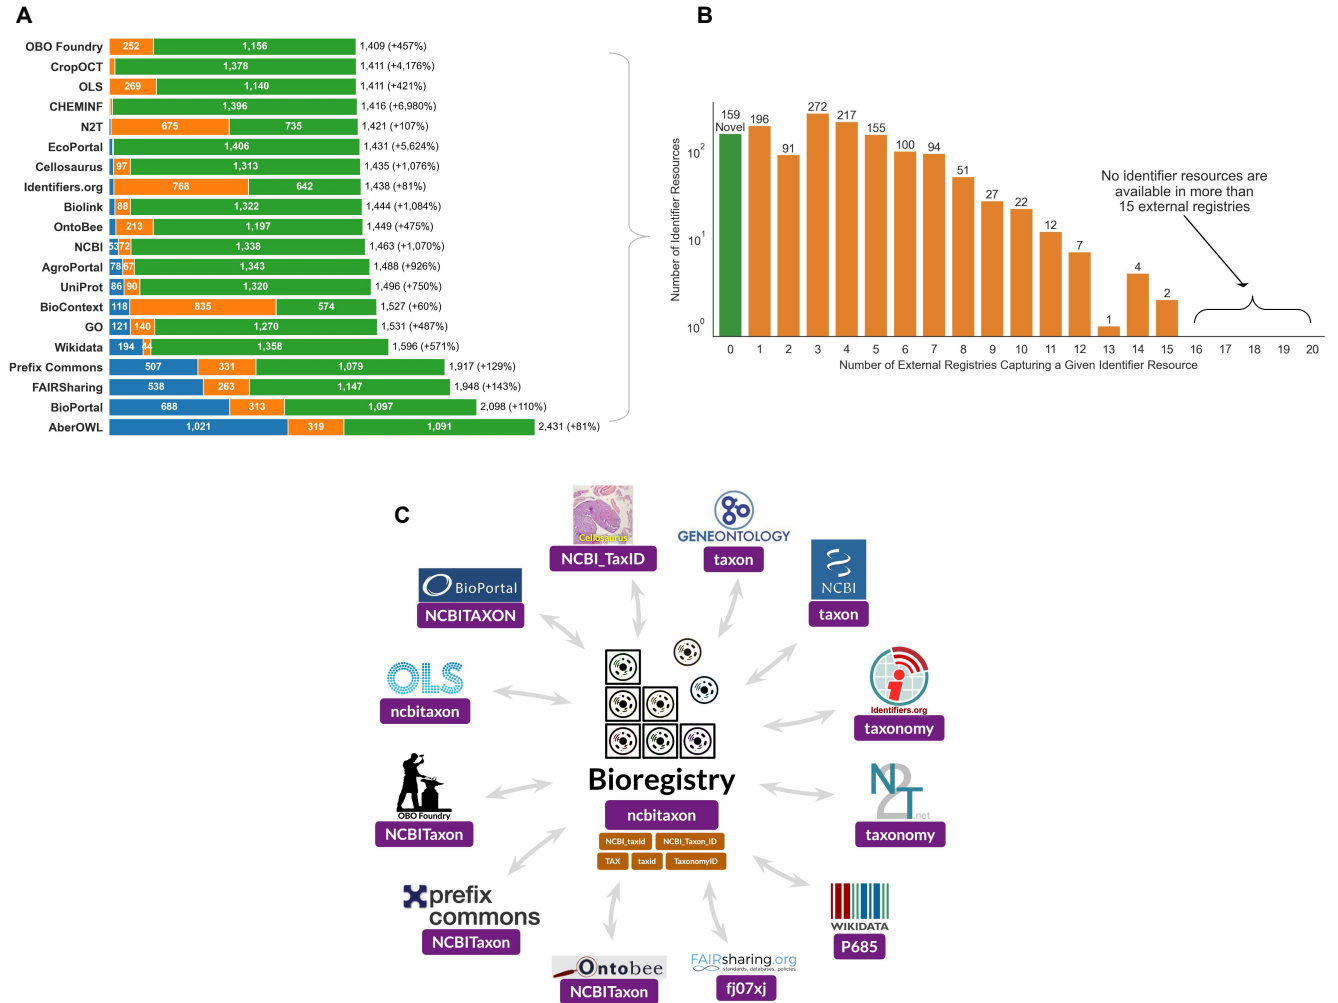

**Figure 1.** **A)** Summary of the pairwise overlap (in orange) between the prefixes in the Bioregistry and its integrated external registries. The blue sections show records that could not be aligned and the green sections represent additional prefixes available in the Bioregistry but not the external resource. The absolute number of records in the union of the external registry with the Bioregistry (accounting for known overlaps) are shown on the right as well as the percentage relative gain introduced by the Bioregistry in parentheses. **B)** A histogram of how many cross references each entry in the Bioregistry has to external registries. The green bar highlights the prefixes with no cross references that only appear in the Bioregistry. **C)** A schematic diagram depicting the Bioregistry as an interoperability layer between external registries. Using the NCBI Taxonomy identifier resource as an example, prefixes used for this resource in external registries that the Bioregistry aligns are shown in purple boxes. Additional synonyms for this resource curated in the Bioregistry are shown in orange boxes. The components of this figure are regenerated daily with GitHub Actions and stored in <https://github.com/bioregistry/bioregistry/tree/main/docs/img>.

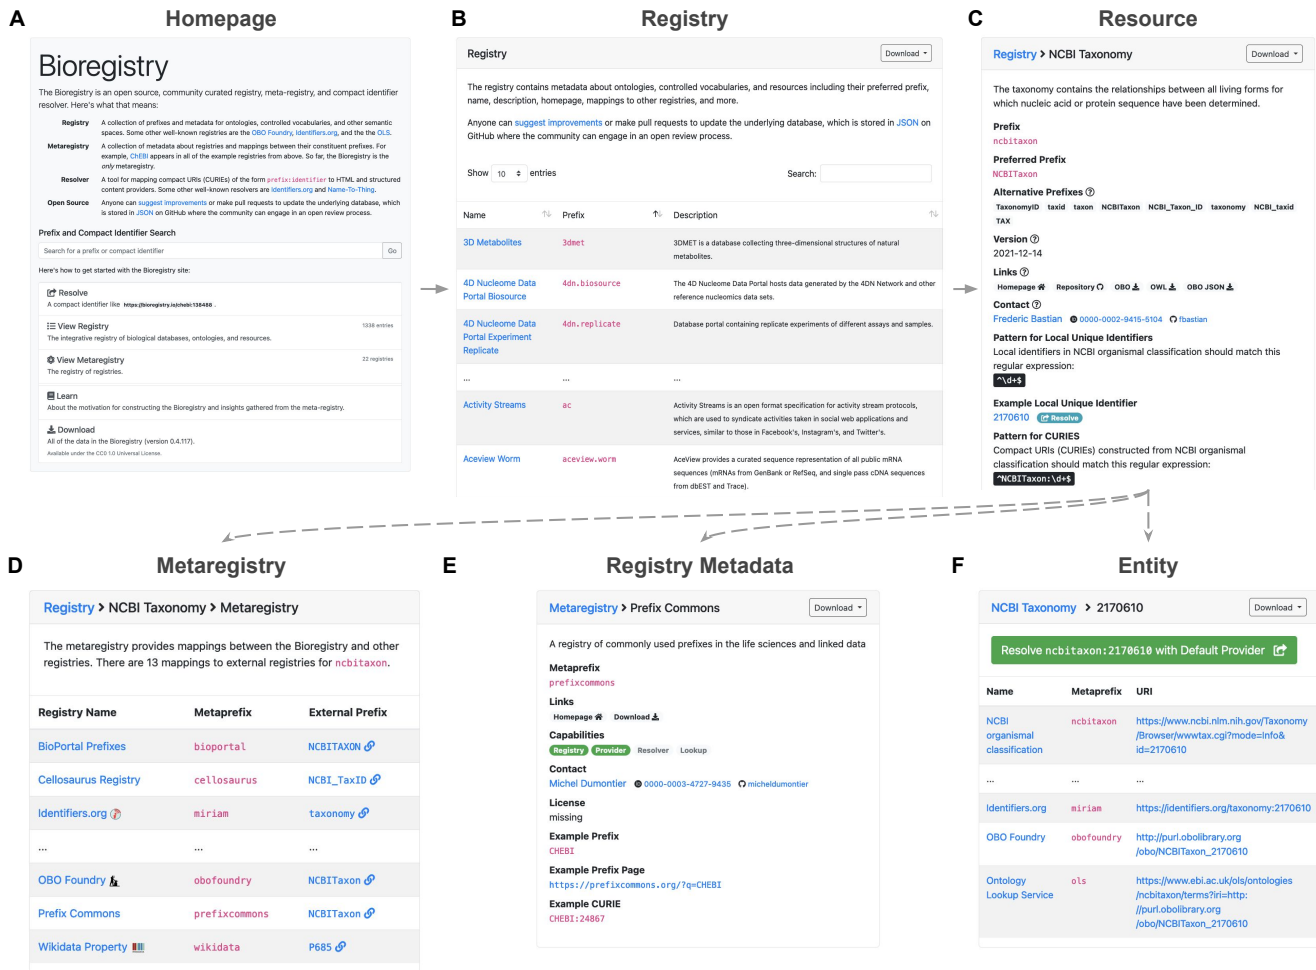

**Figure 2. Website Screenshots.** **A)** The homepage of <https://bioregistry.io> prominently features a combine prefix search and CURIE resolution box along with links to all of the components of the site. **B)** The full registry of prefixes, resource names, and descriptions can be viewed and full text search performed. **C)** Each prefix page shows metadata about the corresponding resource, its identifiers, and serves as a hub for additional functionality in D, E, and F. **D)** The prefix page additionally includes the metaregistry's cross-registry mappings from the prefix to external registries' prefixes. **E)** Each external registry page shows metadata and the capability list of external resources. **F)** a sample identifier demonstrates all of the providers that can be resolved.
