# Unifying the Identification of Biomedical Entities with the Bioregistry

Charles Tapley Hoyt<sup>1</sup>, Meghan Balk<sup>2</sup>, Tiffany J. Callahan<sup>3</sup>, Daniel Domingo-Fernández<sup>4,5</sup>, Melissa A. Haendel<sup>3</sup>, Harshad B. Hegde<sup>6</sup>, Daniel S. Himmelstein<sup>7</sup>, Klas Karis<sup>1</sup>, John Kunze<sup>8</sup>, Tiago Lubiana<sup>9</sup>, Nicolas Matentzoglou<sup>10</sup>, Julie McMurry<sup>11</sup>, Sierra Moxon<sup>6</sup>, Christopher J. Mungall<sup>6</sup>, Adriano Rutz<sup>12,13</sup>, Deepak R. Unni<sup>6,14</sup>, Egon Willighagen<sup>15</sup>, Donald Winston<sup>16</sup>, and Benjamin M. Gyori<sup>1,\*</sup>

<sup>1</sup>Laboratory of Systems Pharmacology, Harvard Medical School

<sup>2</sup>University of Arizona

<sup>3</sup>University of Colorado Anschutz Medical Campus

<sup>4</sup>Department of Bioinformatics, Fraunhofer SCAI

<sup>5</sup>Enveda Biosciences

<sup>6</sup>Lawrence Berkeley National Laboratory

<sup>7</sup>Related Sciences

<sup>8</sup>California Digital Library, University of California

<sup>9</sup>School of Pharmaceutical Sciences, University of São Paulo

<sup>10</sup>Semanticly

<sup>11</sup>University of Colorado, Anschutz Medical Campus

<sup>12</sup>School of Pharmaceutical Sciences, University of Geneva

<sup>13</sup>Institute of Pharmaceutical Sciences of Western Switzerland, University of Geneva

<sup>14</sup>European Molecular Biology Laboratory

<sup>15</sup>Department of Bioinformatics - BiGCaT, NUTRIM, Maastricht University

<sup>16</sup>Polyneme LLC

\*corresponding author(s): Benjamin M. Gyori ([benjamin\\_gyori@hms.harvard.edu](mailto:benjamin_gyori@hms.harvard.edu))

## ABSTRACT

The standardized identification of biomedical entities is a cornerstone of interoperability, reuse, and data integration in the life sciences. Several registries have been developed to catalog resources maintaining identifiers for biomedical entities such as small molecules, proteins, cell lines, and clinical trials. However, existing registries have struggled to provide sufficient coverage and metadata standards that meet the evolving needs of modern life sciences researchers. Here, we introduce the Bioregistry, an integrative, open, community-driven metaregistry that synthesizes and substantially expands upon 23 existing registries. The Bioregistry addresses the need for a sustainable registry by leveraging public infrastructure and automation, and employing a progressive governance model centered around open code and open data to foster community contribution. The Bioregistry can be used to support the standardized annotation of data, models, ontologies, and scientific literature, thereby promoting their interoperability and reuse. The Bioregistry can be accessed through <https://bioregistry.io> and its source code and data are available under the MIT and CC0 Licenses at <https://github.com/biopragmatics/bioregistry>.

## 1 Introduction

One of the key challenges in creating and maintaining Findable, Accessible, Interoperable, and Reusable (FAIR)<sup>1-3</sup> data in the life sciences is the standardized identification of entities ranging from chemicals, proteins, and diseases to patents and publications. These entities are typically curated in *identifier resources* (e.g., ontologies and databases) such as Chemical Entities of Biomedical Interest (ChEBI)<sup>4</sup>, UniProt<sup>5</sup>, and PubMed that assign to each entity a *local unique identifier* (i.e., accession number). Each resource defines an internally consistent pattern for its entities' local unique identifiers, such as the combination of numbers and letters found in UniProt identifiers (e.g., P0DP23) or the simple numbers found in PubMed identifiers (e.g., 29175850). Uniform resource identifiers (URIs) (e.g., <https://www.uniprot.org/uniprot/P0DP23>) and compact uniform resource identifiers (CURIEs) (e.g., `uniprot:P0DP23`) have become the predominant syntaxes used in the life sciences for identifying entities that encode both the resource from which the entity originates and its local unique

37 identifier<sup>6</sup>. URIs encode the resource with a *URI prefix* (e.g., <https://www.uniprot.org/uniprot/>) while CURIEs  
38 encode it with a *prefix* (e.g., uniprot).

39 However, even when using URIs and CURIEs, a number of challenges remain in establishing consistency and interoperability.  
40 Namely, several different incompatible URIs and CURIEs can be used to refer to the same entity. For example, the local unique  
41 identifier P0DP23 for the entry in UniProt<sup>5</sup> about the Calmodulin-1 protein can be represented by at least seven distinct URIs  
42 and three distinct CURIEs (see Supplementary Tables 1 and 2 for details). This problem is compounded when attempting to  
43 integrate multiple resources, a cornerstone of modern computational life sciences. For example, genomic data from HGNC<sup>7</sup> can  
44 not be readily integrated with biochemical reactions data from Rhea<sup>8</sup> because HGNC uses the prefix *ec-code* and Rhea uses  
45 the prefix *EC* when referring to entities in the Enzyme Commission identifier resource<sup>9</sup>. Similarly, many biomedical resources  
46 construct local unique identifiers for the same entity in the Enzyme Commission identifier resource differently, e.g., 1.4 in  
47 IntEnz<sup>10</sup>, 1.4.-.- in the Gene Ontology (GO)<sup>11</sup>, and 1.4.\* in ChEBI for *Oxidoreductases acting on the CH-NH2 group of*  
48 *donors*.

49 In order to standardize the usages of URIs and CURIEs and therefore enable their interoperability, a *registry* is needed  
50 containing canonical, validatable definitions of identifier resources that, for each resource, includes a prefix, a URI prefix,  
51 a local unique identifier pattern, and other associated metadata. Registries thus capture for each identifier resource how to  
52 construct, parse, and interchange canonical URIs and CURIEs. A registry can be used by external biomedical resources to  
53 standardize the way they reference entities (e.g., database cross-references appearing in ontologies) to promote integration with  
54 other resources, as well as by consumers to navigate prefixes and their associated metadata. Multiple registries<sup>5,11-30</sup> have  
55 been previously built for this purpose, but they each suffer from substantial gaps in their coverage of known resources and the  
56 metadata captured about these resources. They also lack interoperability among each others' entries, for example, the National  
57 Center for Biotechnology Information Taxonomy Database (NCBITaxon)<sup>31</sup> is prefixed as *taxonomy* in Identifiers.org<sup>23</sup> and  
58 as *NCBITAXON* in BioPortal<sup>16</sup>.

59 These issues are exacerbated by shortcomings in existing registries' governance and curation workflows, which impede  
60 their ability to stay current, trustworthy, and engage the community as the landscape of life science resources rapidly evolves.  
61 These issues include, that they 1) are built on private infrastructure within an institution; 2) are maintained by small, private  
62 groups that - due to under-funding - struggle to respond to requests; 3) lack adequate support for external contributions 4) are  
63 neither versioned nor archived. As an alternative to general-purpose registries, numerous projects (e.g., GO, Cellosaurus<sup>17</sup>,  
64 NCBI GenBank<sup>24</sup>) have created their own registries, however, these each only cover identifier resources relevant for the given  
65 project, and use standards that are only internally consistent to the project. Finally, several services act as registries but are  
66 by design limited in scope to include a selected set of resources and provide incomplete metadata necessary to promote the  
67 standardization of references. These include the Open Biomedical Ontologies (OBO) Foundry<sup>25</sup>, Ontology Lookup Service  
68 (OLS)<sup>26</sup>, and BioPortal<sup>16</sup>. A detailed survey of the governance and maintenance models for existing registries can be found in  
69 Supplementary Table 3. Overall, the content of any one registry does not reflect the evolving landscape of biomedical resources  
70 and thus satisfy user needs.

71 To overcome the limitations of existing registries, a new approach for building a biomedical registry is necessary, which  
72 ideally fulfills the three requirements: 1) integrative, 2) open, and 3) community-driven. First, an *integrative* registry re-uses,  
73 improves, and extends on existing registries. Given that existing registries define conflicting standards (i.e., assign conflicting  
74 prefixes, URI prefixes, or other metadata for the same identifier resource) and therefore lack interoperability, this necessitates  
75 alignment and harmonization among resources in each registry. Second, an *open* registry makes its underlying data and  
76 associated code available under permissive licenses in a public, version-controlled repository, and relies on free, publicly  
77 available infrastructure for semi-automated quality control and deployment. Third, a *community-driven* registry solicits  
78 contributions from community members and provides an appropriate technical platform and governance structure to support  
79 this. This technical platform needs to support discussion and feedback as well as quality assurance workflows tightly coupled to  
80 the underlying open data, code, and infrastructure. Overall, these properties are expected to promote the sustainability and  
81 longevity of the registry.

82 To address these limitations, we introduce the Bioregistry: an integrative, open, and community-driven metaregistry.  
83 The Bioregistry integrates content from existing registries, semi-automatically identifies equivalences between records in  
84 existing registries, and resolves conflicts between them using a novel workflow. The result of this alignment makes the  
85 Bioregistry a *metaregistry* (i.e., a registry of registries) which, for each resource, maintains cross-registry mappings to serve as  
86 an interoperability layer between conflicting standards. The Bioregistry also includes substantial manual curation for resources  
87 not appearing in any pre-existing registry, and additional curation extends and improves on the metadata associated with  
88 resources in these registries with curation practices heavily influenced by the most similar existing registries (e.g., Identifiers.org  
89 and Prefix Commons). As a result of this process, the Bioregistry expands substantially on the content of each individual  
90 pre-existing registry (e.g., 81% over Identifiers.org) as well as all aligned registries combined (see Table 2 on alignment) and  
91 incorporating feedback from the maintainers and developers of existing registries. The Bioregistry also provides a higher

granularity data model compared to any existing registry thereby better supporting integration. The Bioregistry is built using open source code, open data, and leverages public infrastructure and automation to support its maintenance and extension. Further, it has well-defined contribution guidelines and a multi-institutional governance model that enables contributions directly from the broader community to support the project's longevity.

The Bioregistry (0.5.132) integrates and aligns content previously curated in 23 external registries, and in total, contains 1,504 individual records. These records extend on each prior registry (as compared to e.g., 838 records in BioContext<sup>14</sup> and 774 in Identifiers.org<sup>23</sup>), as well as all aligned registries combined: 192 of the Bioregistry's 1,504 records are novel, i.e. they do not appear in any existing registry. The Bioregistry also adds novel curated metadata for 969 of the remaining 1,312 records (74% of all records). A summary of the content captured in Bioregistry is provided in [Table 1](#). We provide detailed metrics and comparison to other resources in the Results section.

| Category                         | Count |
|----------------------------------|-------|
| External registries imported     | 23    |
| Individual resources represented | 1,504 |
| Cross-registry resource mappings | 7,150 |
| Contributors                     | 36    |

**Table 1.** Overview statistics of the Bioregistry version 0.5.132 (2022-10-17).

The Bioregistry has already been integrated with several projects aimed at data integration, knowledge assembly, and semantically annotated publications, described in [section 3](#) on use cases and integrations. Current integrations of Bioregistry include BridgeDb<sup>32</sup>, PheKnowLator<sup>33</sup>, Manubot<sup>34</sup>, Biomappings<sup>35</sup>, SSSOM<sup>36</sup>, INDRA<sup>37</sup>, and the OBO Foundry<sup>25</sup>.

The Bioregistry is available through an interactive web portal (<https://bioregistry.io>), an OpenAPI-documented web service (<https://bioregistry.io/apidocs>), a Python software package (<https://pypi.org/project/bioregistry>), and a Docker image (<https://hub.docker.com/r/biopragmatics/bioregistry>). All underlying data, code, and governance documentation are accessible through GitHub (<https://github.com/biopragmatics/bioregistry>) under the MIT and CC0 licenses and archived on Zenodo<sup>38</sup>.

## 2 Results

### Bioregistry Data Model

The Bioregistry uses a granular and extensible data model to represent records of identifier resources. Required fields for each record include a canonical prefix, a human-readable label, a homepage, and a description. The data model also allows for multiple optional fields including the license, version, prefix synonyms for the resource, and capturing whether the resource is deprecated or proprietary. Each record can further include an example local unique identifier, a regular expression pattern for validating local unique identifiers, and a URI format string for constructing URIs from local unique identifiers. Records describing ontologies can include optional download links for associated OBO, OWL, and OBO Graph JSON artifacts. To keep contributions traceable and provide attribution, each record captures the submitter and reviewer who contributed to the entry. Records can also be grouped into collections for better contextualization, such as prefixes useful for the Semantic Web (e.g., DC, FOAF, RDF, RDFS).

A comparison between the data model and various properties of the Bioregistry and external registries in [Table 2](#) demonstrates the heterogeneity of metadata standards in external registries and the flexibility of the Bioregistry to represent more granular metadata. For example, this enables the Bioregistry to represent deprecated and obsolete records for posterity, such as [hgnc.genefamily](#) (the HGNC Gene Family resource<sup>39</sup>) which was replaced by [hgnc.genegroup](#), and [casspc](#) (Eschmeyer's Catalog of Fishes<sup>40</sup>) which is used by the Teleost Taxonomy Ontology<sup>41</sup> and Vertebrate Taxonomy Ontology<sup>42</sup> but was itself never published.

Importantly, the Bioregistry captures not only individual resource records but also semantic relationships between records (including e.g., *depends on*, which asserts that one resource reuses terms from another, such as GO depends on ChEBI, and mappings of each resource to external registries where it appears. These additional relations constitute the Bioregistry's *metaregistry*, a term meant to represent the fact that it creates links among previously incompatible resources through a set of cross-registry mappings.

The Bioregistry data model is described in further detail in Supplementary Section 3.

### Integration and harmonization of existing registries

The Bioregistry imports records from the 23 external registries described in [Table 2](#). We divided registries into distinct groups to which we applied different import policies ranging from registries imported entirely to ones from which metadata for only

| Registry    | Metadata Model                |          |             |              |              |          |                |               |         |         |         | Capabilities and Qualities |           |                   |                    |               |                 |                |              |
|-------------|-------------------------------|----------|-------------|--------------|--------------|----------|----------------|---------------|---------|---------|---------|----------------------------|-----------|-------------------|--------------------|---------------|-----------------|----------------|--------------|
|             | Name                          | Homepage | Description | Example LUID | LUID Pattern | Provider | Alt. Providers | Alt. Prefixes | License | Version | Contact | Structured Data            | Bulk Data | No Auth. Required | Permissive License | Prefix Search | Prefix Provider | CURIE Resolver | CURIE Lookup |
| Bioregistry | Y                             | Y        | Y           | Y            | o            | o        | o              | o             | o       | o       | o       | Y                          | Y         | Y                 | Y                  | Y             | Y               | Y              | Y            |
| 1           | AberOWL <sup>12</sup>         | Y        | Y           | Y            | o            | o        |                |               |         | o       |         | Y                          | Y         | Y                 |                    | Y             | Y               |                | Y            |
| 2           | AgroPortal <sup>13</sup>      | Y        | Y           | Y            | o            |          | Y              |               | o       | o       | o       | Y                          |           |                   |                    | Y             | Y               |                | Y            |
| 3           | BioContext <sup>14</sup>      |          |             |              |              |          | o              |               |         |         |         | Y                          | Y         | Y                 |                    |               | Y               |                |              |
| 4           | Biolink <sup>15</sup>         | Y        |             |              |              |          | Y              |               | o       |         |         | Y                          | Y         | Y                 |                    |               |                 |                |              |
| 5           | BioPortal <sup>16</sup>       | Y        | Y           | Y            | o            |          | Y              |               |         | Y       | o       | Y                          |           |                   |                    | Y             | Y               |                | Y            |
| 6           | Cellosaurus <sup>17</sup>     | Y        | Y           |              |              |          | Y              |               |         |         |         | Y                          | Y         | Y                 | Y                  |               |                 |                |              |
| 7           | CHEMINF <sup>18</sup>         | Y        |             |              |              |          |                |               |         |         |         | Y                          | Y         | Y                 | Y                  |               | Y               |                | Y            |
| 8           | CropOCT <sup>19</sup>         | Y        | Y           |              | o            |          | Y              |               |         |         |         | Y                          | Y         | Y                 | Y                  | Y             | Y               |                | Y            |
| 9           | EcoPortal <sup>20</sup>       | Y        | o           | Y            | o            |          |                |               | o       | o       | o       | Y                          |           |                   |                    | Y             | Y               |                | Y            |
| 10          | EDAM <sup>43</sup>            | Y        |             |              |              |          |                |               |         |         |         | Y                          | Y         | Y                 |                    | Y             | Y               |                |              |
| 11          | FAIRSharing <sup>22</sup>     | Y        | Y           | Y            |              |          |                |               |         |         | Y       | Y                          |           |                   |                    | Y             | Y               |                |              |
| 12          | GO <sup>11</sup>              | Y        | o           | o            | o            | o        | o              |               |         |         |         | Y                          | Y         | Y                 | Y                  |               |                 |                |              |
| 13          | HL7/FHIR <sup>21</sup>        | Y        | o           | o            |              |          |                |               |         |         | o       | Y                          |           | Y                 |                    |               | Y               |                |              |
| 14          | Identifiers.org <sup>23</sup> | Y        | Y           | Y            | Y            | Y        | Y              | o             |         |         |         | Y                          | Y         | Y                 | Y                  | Y             | Y               | Y              |              |
| 15          | N2T <sup>28</sup>             | Y        | Y           | Y            | Y            | Y        | Y              | o             | o       |         |         | Y                          | Y         | Y                 | Y                  |               | Y               | Y              |              |
| 16          | NCBI GenBank <sup>24</sup>    | Y        | Y           |              | Y            |          |                |               |         |         |         |                            | Y         | Y                 |                    |               |                 |                |              |
| 17          | OBO Foundry <sup>25</sup>     | Y        | Y           | Y            |              |          |                |               | Y       |         | Y       | Y                          | Y         | Y                 | Y                  | Y             | Y               | Y              |              |
| 18          | OLS <sup>26</sup>             | Y        | o           | Y            | o            |          | o              |               | Y       | o       | o       | Y                          | Y         | Y                 |                    | Y             | Y               |                | Y            |
| 19          | OntoBee <sup>27</sup>         | Y        | Y           | Y            | o            |          | o              |               |         |         | Y       |                            | Y         | Y                 |                    |               | Y               |                | Y            |
| 20          | Prefix Commons <sup>29</sup>  | Y        | o           | o            | o            | o        | o              | o             |         |         |         | Y                          | Y         | Y                 |                    | Y             | Y               |                |              |
| 21          | re3data                       | Y        | Y           | Y            |              |          |                |               | o       |         | o       |                            |           | Y                 | Y                  | Y             | Y               |                |              |
| 22          | UniProt <sup>5</sup>          | Y        | Y           |              |              |          | Y              |               |         |         |         | Y                          | Y         | Y                 | Y                  | Y             | Y               |                |              |
| 23          | Wikidata <sup>30</sup>        | Y        | o           | Y            | o            | o        | o              |               | o       | o       | o       | Y                          | Y         | Y                 | Y                  | Y             | Y               |                |              |

**Table 2.** An overview of the data models, capabilities, and qualities of the 23 external registries covering biomedical ontologies, controlled vocabularies, and databases imported by the Bioregistry. A "Y" means the field is required. A "o" means it is part of the schema, but not required or incomplete on some entries. A blank cell means that it is not part of the metadata schema. Two glossaries describing the elements in the data model (left) and capabilities and qualities (right) appearing as column headers in this table can be found respectively in Supplementary Sections 3.1 and 8.1.

select records are imported (see Methods). The Bioregistry uses a multi-stage process in which registries are sequentially imported such that a record from a given registry is either 1) aligned with an existing Bioregistry record and a cross-registry mapping is created 2) added as a new record, or 3) set aside for manual curation (see Methods). The key challenge in this import process is aligning (i.e., finding equivalences between) records since the external registries' records are partially overlapping but inconsistent. This inconsistency stems from high heterogeneity among existing registries in the usage of capitalization (e.g., go vs. GO), punctuation (e.g. ec-code vs eccode), abbreviations (e.g., flybase vs. fb), and even different vocabulary (e.g., intenz vs. eccode) to represent the same resource, which results in fragmentation and lack of interoperability. A novel contribution of the Bioregistry is that it explicitly represents the results of its alignment procedure as equivalence mappings between its own records and records in external registries. This constitutes a network of cross-registry mappings (with Bioregistry as the hub), creating a metaregistry. The Bioregistry's alignment procedure recovers a total of 7,150 such cross-registry mappings thereby connecting resources across existing registries that were previously disconnected. Importantly, the Bioregistry does not import nor redistribute the resources described by external registries, which themselves may have restrictive licenses (e.g., ICD-10). Further, rather than pushing enriched metadata back to the existing registries, the Bioregistry instead makes its content available under a permissive license in many formats (described in Figure 2) that can be individually processed by each external registry's maintainers to best suit their needs.

We additionally curated 423 synonyms used when referring to identifier resources outside registries such as in OBO Foundry ontology database cross-references. These synonyms support the registry alignment workflow and broaden the ability of



153 Bioregistry to standardize references to identifier resources beyond just external registries.

154 We investigated how the content of the integrated Bioregistry compares to each individual external registry that it imports  
155 and aligns (Figure 1A). It covers several registries (BioContext<sup>14</sup>, CHEMINF<sup>18</sup>, Crop Ontology Curation Tool (CropOCT)<sup>19</sup>,  
156 OBO Foundry<sup>25</sup>, OLS, Name-to-Thing (N2T)<sup>28</sup>, Identifiers.org<sup>23</sup>) almost entirely (over 85% of the external registries' records  
157 are mapped to a Bioregistry record) while significantly expanding on the content of each of them from a minimum of +94% for  
158 Identifiers.org to a maximum of +7,076% for CHEMINF. The Bioregistry is able to align a smaller proportion of records in  
159 external registries such as FAIRSharing<sup>22</sup> (33.3%), BioPortal<sup>16</sup> (31.3%), Aber-OWL<sup>12</sup> (23.8%), and Wikidata (20.7%) due  
160 to several characteristics of each registry. For example, many records in FAIRSharing<sup>22</sup> do not refer to identifier resources,  
161 Wikidata contains many records lacking a biological scope, and Aber-OWL and BioPortal contain ontologies of heterogeneous  
162 quality which are queued for on-demand inclusion rather than automated ingestion into in the Bioregistry (see Methods).  
163 Despite lower coverage of their entries, the Bioregistry still substantially expands on these external registries between a  
164 minimum of +86% for Aber-OWL to a maximum of +6,000% for EcoPortal<sup>20</sup>.

165 We then investigated the frequency of appearance of each identifier resource in multiple registries (Figure 1B). We found  
166 that only 7 resources appeared in more than 13 of the 23 external registries (including well-known resources such as GO,  
167 ChEBI, and NCBITaxon), and no resource appeared in more than 17, further illustrating the fragmented state of existing  
168 registries and the benefits of an integrative registry in having improved coverage. Further, the Bioregistry contains 192 novel  
169 prefixes not available in any other registry (Figure 1B, green bar) that were curated for a diverse set of reasons. For example,  
170 we systematically reviewed cross-references in OBO Foundry ontologies, found a number of prefixes referring to resources for  
171 which no external registry contained an entry, and added them to the Bioregistry. Several novel prefixes were suggested by  
172 external contributors who were themselves the maintainers of the corresponding resource. Another subset of these entries were  
173 added by members of the community who encountered them and were then motivated to create an entry for it in the Bioregistry.

174 Next, we examined NCBITaxon, one of the resources that appears in the largest number of existing registries. This identifier  
175 resource appears in 17 external registries under 10 different prefixes including `taxon`, `taxonomy`, and `NCBITaxon` (Fig-  
176 ure 1C, not all shown). In addition, the Bioregistry curates 9 prefix synonyms (e.g., `NCBI_Taxon_id`, `uniprot.taxonomy`,  
177 `NCBI_taxid`) that appear in various non-registry biomedical resources, demonstrating the high heterogeneity of usages for a  
178 given identifier resource. Such cross-registry mappings and synonyms in the Bioregistry enable it to act as an interoperability  
179 layer to standardize across a large number of external registries and non-registry resources.

## 180 Web portal for interactive and programmatic use

181 The contents of the Bioregistry can be browsed interactively through the web portal at <https://bioregistry.io>  
182 shown in Figure 2. The portal implements a powerful search feature to help users look up prefixes and CURIEs they  
183 encounter in various databases, ontologies, and other biomedical resources. The search feature extends to not only the  
184 prefix, synonyms, title, and description of each record, but also all of the corresponding fields in linked records from external  
185 registries (Figure 2A). The full prefix list can be browsed (Figure 2B) and each prefix page organizes and contextualizes  
186 all information available from novel curation in the Bioregistry as well as imported from external registries (Figure 2C, D).  
187 Notably, it links to external registry pages when mappings are available. For example, the page for NCBITaxon (<https://bioregistry.io/ncbitaxon>)  
188 links to a large number of external registry pages (Figure 2E). In addition to the data  
189 in the Bioregistry, this page constructs example URIs for first-party providers, third-party providers (e.g., OntoBee<sup>27</sup>, OLS),  
190 and external resolvers (e.g., Identifiers.org, N2T) using a combination of information stored about external registries and  
191 programmatic logic in the underlying Bioregistry Python package (Figure 2F). The web portal provides several other features  
192 including generating pages for each of the external registries integrated into the Bioregistry that show their various properties  
193 and functionalities, facilitating curating and displaying user-generated collections of prefixes such as the list of Semantic Web  
194 prefixes at <https://bioregistry.io/collection/0000002>, and listing contributors. The portal also implements  
195 a resolver that allows for the uniform construction of URIs from CURIEs that are automatically redirected to the appropriate  
196 location based on the URI format string annotated to the CURIE's prefix. The Bioregistry's resolver uses the URI scheme  
197 `https://bioregistry.io/<prefix>:<local-unique-identifier>`, similar to the resolver schemes used by  
198 Identifiers.org and N2T. Bioregistry also makes available a programming language-agnostic RESTful interface that gives access  
199 to all functionality (e.g., search, autocompletion, record retrieval, URI generation) and is documented with OpenAPI/Swagger at  
200 <https://bioregistry.io/apidocs>. The underlying data used to generate each page can be downloaded in a variety  
201 of formats including JSON, YAML, TSV, RDF, and others (where applicable). Finally, the portal serves as a hub for links to the  
202 code, data, documentation, and narrative surrounding the Bioregistry.

203 As a companion to the main Bioregistry site, a static site is automatically generated and deployed to <https://biopragmatics.github.io/bioregistry>  
204 using GitHub's infrastructure. Notably, this includes a *health report*  
205 that runs a weekly check for which of the Bioregistry's resources' homepages are still accessible (i.e., do not return HTTP 404  
206 or other connection errors) and which resources' URI format strings are still valid. The site both provides a high-level summary

207 of which resources have recently become invalid as well as a detailed, color-coded table reflecting the statuses of all Bioregistry  
208 records. Ultimately, this site can help more systematically monitor and improve the maintenance of biomedical resources.

### 209 **Exported artifacts for data integration and reusability**

210 The Bioregistry GitHub repository contains the root content of the database (i.e., the registry, metaregistry, and collections) as  
211 JSON files in a version controlled setting, serving as the single source of truth. In addition, it makes available several derived  
212 artifacts that are meant to facilitate integration with downstream systems and resources. These exported artifacts are regenerated  
213 daily, and made available via the web portal at <http://bioregistry.io/download> and are archived on Zenodo<sup>38</sup>.

214 In addition to the native JSON format, the Bioregistry data is made available as a set of YAML and TSV files to facilitate  
215 reuse. Further, equivalence mappings between resources in external registries are exported into the Simple Standard for Sharing  
216 Ontological Mappings (SSSOM)<sup>36</sup> format. SSSOM is a standard for sharing mappings between different namespaces that we  
217 use to represent mappings between resources appearing in different registries, such as the relations exemplified in [Figure 1C](#).

218 The Bioregistry also provides a number of artifacts to facilitate integration with Semantic Web contexts and linked  
219 open data. First, we constructed an RDF schema for the Bioregistry that reuses elements from common Semantic Web  
220 vocabularies (e.g., DC, FOAF) and creates its own elements in the `bioregistry.schema` vocabulary described at <https://bioregistry.io/schema>. All components of the Bioregistry (i.e., the registry, metaregistry, collections) were  
221 jointly exported into RDF under this schema in several commonly used formats including N-Triples, Turtle and JSON-  
222 LD. This allows the Bioregistry to be loaded using triple stores (e.g., Virtuoso) or programming libraries (e.g. Python's  
223 RDFLib) and subsequently queried with SPARQL. We also assembled a network derived from the RDF export that can  
224 be browsed interactively on the Network Data Exchange (NDEX)<sup>44</sup> available at [https://bioregistry.io/ndex:  
225 860647c4-f7c1-11ec-ac45-0ac135e8bacf](https://bioregistry.io/ndex:860647c4-f7c1-11ec-ac45-0ac135e8bacf).

226 Finally, the Bioregistry makes available several Semantic Web contexts that each map a set of prefixes (e.g., `chebi`) to a  
227 corresponding URI prefix (e.g., [http://purl.obolibrary.org/obo/CHEBI\\_](http://purl.obolibrary.org/obo/CHEBI_)). These are derived from the root data  
228 using a set of policies for choosing a preferred prefix and URI format for resources in the registry. In addition to a general  
229 purpose context encompassing all of Bioregistry, we make available application-specific semantic contexts for integration with  
230 the OBO Foundry, and a context limited to prefixes useful for general Semantic Web resources.

### 232 **Maintenance model and governance**

233 In contrast to the maintenance and governance structures employed by existing registries, the Bioregistry takes an alternative  
234 approach relying on open data, open code, open infrastructure, automated testing, and automated updating. Similar models  
235 have been adopted with great success in existing large collaborative projects such as the OBO Foundry. We accomplished  
236 this through several steps. First, the Bioregistry data is stored and versioned using GitHub (see Methods). Second, anyone  
237 can propose additions or changes either directly by submitting a pull request to the Bioregistry repository or by filling out an  
238 appropriate issue template that triggers an automated generation of a pull request. Both create an open forum for discussion  
239 that invites a wide variety of stakeholders to engage (implementation details in Methods). Third, using GitHub allows for the  
240 technical implementation of quality control and quality assurance workflows that are coupled to pull requests in order to ensure  
241 that all changes meet a predefined set of standards, which are described explicitly and publicly in the contribution guidelines<sup>1</sup>  
242 as well as implicitly in the implementation of the quality assurance workflow. In addition to the open data, open code, open  
243 infrastructure philosophy, the Bioregistry project has sought out community guidance on how to establish a governance model  
244 that is more robust to the fluctuation of funding and personnel who are actively working on and moderating the project. This has  
245 resulted in the establishment of a Review Team and a Development Team as well as a public minimal governance model<sup>2</sup> that  
246 describes how to induct new members, how to remove members, who respectively has the technical authority and community  
247 responsibility to facilitate and ultimately judge changes to the underlying database and make changes to the code base, and  
248 how to improve the governance model over time. These teams have been initially seeded with members from diverse scientific  
249 backgrounds, locations, and institutions to further promote the durability of the project. These guidelines also include a liberal  
250 policy on authorship to further demonstrate the project's commitment to inclusivity.

## 251 **3 Use cases and integrations**

252 Here, we highlight several projects and standards that have already adopted various functionalities of the Bioregistry.

### 253 **Supporting Interoperable Data Annotation**

254 Several projects use the Bioregistry to create *prefix maps*, or mappings between prefixes (e.g., `uniprot`) and their corre-  
255 sponding URI prefixes (e.g., <https://www.uniprot.org/uniprot/>). These support the the interoperability of data

<sup>1</sup><https://github.com/biopragmatics/bioregistry/blob/main/docs/CONTRIBUTING.md>

<sup>2</sup><https://github.com/biopragmatics/bioregistry/blob/main/docs/GOVERNANCE.md>

256 annotations and the conversion between URIs and CURIEs in Semantic Web applications. The Simple Standard for Sharing  
257 Ontological Mappings (SSSOM)<sup>36</sup> is a metadata standard for various mappings (e.g., equivalences) between ontology and  
258 database terms and an associated toolset (<https://github.com/mapping-commons/sssom-py>) based on LinkML (<https://linkml.io>)  
259 for loading, validating, and converting SSSOM content. The standard is meant to encourage higher quality curation in  
260 biomedical ontologies which often lack important metadata such as the mapping type, a standardized prefix and local unique  
261 identifier for the subject and object terms, provenance about how the mapping was generated, and provenance about who  
262 generated the mapping. The default prefix map used in validation is generated by the Bioregistry following the procedure  
263 described in Supplementary Section 6.1.

264 Manubot<sup>34</sup> is a tool for open collaborative writing that aims to bring automation, customizability, and transparency to  
265 scholarly publishing. With Manubot, users write manuscripts using markdown with special support for citation by persistent  
266 identifiers represented as CURIEs such as `[@doi:10.1371/journal.pcbi.1007128]` (which can then be automati-  
267 cally turned into a full citation). Embedding CURIEs in manuscripts is especially valuable when referring to resources that  
268 are not citable manuscripts such as clinical trials (e.g., in a review of COVID-19<sup>45</sup>). Manubot initially added support for  
269 700 CURIE prefixes by incorporating Identifiers.org but later switched to the Bioregistry which at the time added support  
270 for an additional 365 prefixes. Besides being more comprehensive, the Bioregistry's open contribution model allowed for  
271 addressing several longstanding issues with Identifiers.org including invalid regular expression patterns, missing prefixes, as  
272 well as inconsistencies due to some namespaces being redundantly embedded in identifiers.

273 We discuss the plans and considerations for adopting the Bioregistry for interoperable data annotation in further software  
274 and resources including the Biolink Model<sup>15</sup> and the Alliance of Genome Resources<sup>46</sup> in Supplementary Section 7.

## 275 Validation and Quality Control of Entity References

276 Several projects use the Bioregistry to standardize or validate prefixes and local unique identifiers and promote interoperability  
277 and reusability. Biomappings<sup>35</sup> (<https://github.com/biopragmatics/biomappings>) is a repository for curated  
278 and predicted mappings between equivalent (or otherwise related) biomedical entities in different identifier resources. It  
279 contains several workflows for generating predicted mappings using Gilda<sup>47</sup> and provides a web-based curation interface for  
280 reviewing predicted mappings and adding novel ones. Biomappings ensures data integrity by validating all prefixes and local  
281 unique identifiers in the repository using the Bioregistry. Further, the curation interface uses the Bioregistry to generate links to  
282 a web page describing each biomedical entity, making curation easier. Biomappings also generates a web-based summary of its  
283 content that uses the Bioregistry to provide links to identifier resources and to resolve CURIEs.

284 The Integrated Network and Dynamical Reasoning Assembler (INDRA)<sup>37</sup> assembles biomedical knowledge from multiple  
285 databases combined with text mining of scientific publications to construct executable models. When performing assembly,  
286 INDRA maintains references to biomedical entities that are grounded to one or more identifier resources. It uses the Bioregistry  
287 to first check that the prefixes used in these groundings are standardized, and then to validate the associated unique local  
288 identifier according to the pattern provided by the Bioregistry. This validation is critical for maintaining consistency in INDRA's  
289 automated assembly workflows.

290 The Phenotype Knowledge Translator (PheKnowLator)<sup>33</sup> ecosystem constructs FAIR biomedical knowledge graphs using  
291 ontologies and reasoning with the addition of non-ontological data sources. PheKnowLator uses the Bioregistry to standardize  
292 references in CURIEs and URIs from both data types to provide semantically consistent results for downstream use cases. The  
293 Bioregistry helps overcome significant challenges posed by ontologies (e.g., changing namespaces over time, data that is not  
294 from an ontology that does not provide valid namespaces or URIs), and their integration. The Bioregistry API has become  
295 a vital component of the build process and is used to standardize URIs for all entities and triples. It has also provided new  
296 opportunities to extend PheKnowLator's testing harness. Overall, the inclusion of Bioregistry has improved the PheKnowLator  
297 Ecosystem and the knowledge graphs it produces. Similarly, the Graph Representation Learning, Predictions and Evaluation  
298 (GRAPE)<sup>48</sup> software package uses the Bioregistry to normalize the identifiers in several networks and knowledge graphs  
299 (including PheKnowLator).

## 300 Contextualizing Entities with Website Links

301 Several projects use the Bioregistry to generate and resolve URIs within their APIs or user-facing websites in order to provide  
302 additional context to the entities they reference. BridgeDb<sup>32</sup> is a web service that maps between local unique identifiers from  
303 different identifier resources representing equivalent entities (e.g., P0DP23 in UniProt Q17855525 and in Wikidata for the  
304 Calmodulin-1 protein). The Bioregistry has been integrated in BridgeDb's Java and R clients as well as Bacting<sup>49</sup> to enable  
305 lookup based on standardized CURIEs, to enable creating internal BridgeDb identifier objects *via* standardized CURIEs, and to  
306 generate URIs resolvable through the Bioregistry web application.

307 The Bioregistry has also been used in several websites to generate URLs for human genes, protein complexes, and other  
308 entities. For example, the DUB Portal<sup>50</sup> is a website summarizing experimental analyses of deubiquitinating enzymes and  
309 uses the Bioregistry to link to human genes in HGNC and protein families in the FamPlex vocabulary<sup>51</sup>. The website for

310 FamPlex<sup>3</sup> also uses the Bioregistry to standardize and link references for human genes; equivalence mappings to InterPro<sup>52</sup>,  
311 Medical Subject Headings (MeSH)<sup>53</sup>, GO, Complex Portal<sup>54</sup>, NextProt<sup>55</sup> for protein families and complexes; and references  
312 for publications in PubMed and PubMed Central. Similarly, the interactive user interface for the BERN2<sup>56</sup> named entity  
313 recognition platform standardizes its biomedical entities and generates links using the Bioregistry.

### 314 **Unified Access to External Registries**

315 Because of its integration of external registries, the Bioregistry is also useful for unified access to their respective data. The OBO  
316 Foundry<sup>25</sup> facilitates the coordinated development of biomedical ontologies through a set of guiding principles and community  
317 organization. Its associated repository (<https://github.com/OBOFoundry/OBOFoundry.github.io>) stores the  
318 structured metadata about each ontology, including their preferred prefix, title, homepage, description, and usages. The  
319 Bioregistry is used to support the standardization and maintenance of this metadata in several ways described in detail in  
320 Supplementary Section 6.2.

## 321 **4 Discussion**

322 We presented the Bioregistry, an integrative registry of biomedical identifier resources. The Bioregistry takes a novel approach  
323 to curation by importing and harmonizing data from external registries that can be further improved and extended with novel  
324 curation. It relies on an open data, open code, open infrastructure philosophy combined with a novel governance strategy to  
325 foster community contributions and engagement, and ensure its longevity and adoption. It uses public infrastructure for quality  
326 assurance, distribution, and deployment to promote transparency, reduce cost, and uncouple its long-term maintenance from a  
327 specific institution, funding source, or group of maintainers. While the Bioregistry demonstrates higher coverage and metadata  
328 granularity than other registries, it also explicitly encourages reuse and redistribution via its highly permissive CC0 license.

### 329 **Limitations**

330 Entries in the Bioregistry that represent identifier resources, their preferred CURIE prefix, and other metadata are integrated  
331 semi-automatically from external registries (such as Identifiers.org and Name-to-Thing (N2T)<sup>28</sup>) or manually curated directly  
332 in the Bioregistry. The design choice that the Bioregistry semi-automatically imports and aligns content from external registries  
333 is important for maintaining broad coverage, and to distribute curation effort across multiple projects. However, this still poses  
334 challenges for consistency. Namely, the Bioregistry has limited ability to enforce guidelines and conventions in other registries.  
335 For instance, there are differing views in the community on stylistic choices in the capitalization of preferred CURIE prefixes  
336 (e.g., *chebi* vs CHEBI or ChEBI) for identifier resources. Drawing on other registries can also lead to future conflicts where  
337 multiple registries choose the same CURIE prefix for two different identifier resources, creating a situation that has to be  
338 retroactively arbitrated in the Bioregistry (an example is given in Supplementary Section 5.2). Nevertheless, the Bioregistry  
339 maintains guidelines<sup>4</sup> for creating new identifier resource prefixes, which, if followed, can mitigate these issues. Further, the  
340 purview of the Bioregistry does not extend to directly advising and mentoring creators of new identifier resources to make  
341 good choices in their identifier schemes. Creators of such resources can rely on recommendations such as those suggested by  
342 McMurry *et al.* (2017)<sup>6</sup>.

343 Adopting the Bioregistry's standard for prefixes, CURIEs, and URIs in a new resource is straightforward. However, applying  
344 it retroactively to an existing resource can pose challenges. It may require updating the data and associated code in the resource  
345 itself as well as in downstream consumers of the resource. This can manifest in several ways, including updating non-standard  
346 synonyms (e.g. many ontologies use MSH as a non-standard prefix for MeSH), updating non-standard construction of CURIEs  
347 (e.g., using redundant prefixes as prescribed by Identifiers.org like in `GO:GO:0006915`), or updating non-standard URIs (e.g.,  
348 switching all ORCID URIs to use the *https* protocol). If such changes are not feasible in the resource, it is still possible to  
349 implement mappings to the Bioregistry or create custom exports following the Bioregistry standard, potentially broadening the  
350 resource's interoperability.

351 The Bioregistry provides a solution for standardizing references to individual entries in identifiers resources. However,  
352 it is often the case that multiple identifiers resources contain entries representing equivalent entities (e.g., multiple disease  
353 ontologies representing the same disease) leading to redundancy when integrating disparate resources, such as when constructing  
354 knowledge graphs. Determining which identifier resource to prioritize when representing an entity that appears in multiple  
355 resources is beyond the scope of the Bioregistry. Nevertheless, the Bioregistry can contribute to the standardization of the cross-  
356 references between equivalent entities in different identifiers resources (cross-references, in practice, often use non-standard  
357 CURIEs and URIs) thereby helping redundancy resolution among them.

358 While the Bioregistry is limited to resources of interest to researchers in the life sciences, its methodology and technological  
359 implementation could extend to other scientific areas. Ultimately, the Bioregistry could serve as a template for the creation

<sup>3</sup><https://sorgerlab.github.io/famplex>

<sup>4</sup><https://github.com/biopragmatics/bioregistry/blob/main/docs/CONTRIBUTING.md#submitting-new-prefixes>



360 of domain-specific metaregistries in other areas or be the basis for the creation of a metaregistry spanning multiple scientific  
361 domains.

### 362 **Future Work on the Bioregistry**

363 Following the initial development, deployment, and early adoption of the Bioregistry, two ongoing challenges remain. The first  
364 is to be responsive in the maintenance, enrichment, and extension of the content in the registry to best reflect the reality of  
365 the ever-changing landscape of biomedical identifier resources. While this has not been realized by previous registries, the  
366 Bioregistry's combination of technical infrastructure and governance model will enable this effort in a sustainable way. Further,  
367 we plan to develop tools and curation practices to proactively, systematically identify new resources to add to the Bioregistry.

368 The second is to build and maintain a community of users. This entails continuing to engage multiple groups of users and  
369 stakeholders. This includes curators, and consumers of biomedical resources, as well as groups designing automated data- or  
370 knowledge-extraction and aggregation systems. Serving the needs of these communities requires identifying their challenges,  
371 and improving the Bioregistry's data model, tooling, and content accordingly. It also entails facilitating discussion between a  
372 diverse set of individuals and offering training for usage of the Bioregistry and its philosophy. To this end, the authors plan to  
373 organize a set of recurring community workshops (following an initial workshop held in 2021<sup>5</sup>) around the topics of identifier  
374 resources and registries.

### 375 **Future Vision**

376 We envision the Bioregistry could more broadly be used to promote and support the standardized annotation of data, models,  
377 ontologies, and scientific literature. First, the growing body of data being made available through publications and data  
378 repositories often lack standardized annotations to their records (e.g., columns in a table, nodes/edges in knowledge graphs). If  
379 adopted by the diverse set of curators, developers, maintainers, and users of life science tools and resources, the Bioregistry  
380 could provide a consistent way of annotating these data to make them more FAIR, especially facilitating reuse.

381 Second, we envision the Bioregistry supporting the standardization of structured metadata associated with models and  
382 networks derived from data such as mechanistic models (e.g., in the BioModels database<sup>57</sup>), network-based models (e.g., in  
383 Network Data Exchange (NDEX)<sup>44</sup>), knowledge graphs (e.g., those described by Bonner *et al.*<sup>58</sup>), and machine learning models  
384 (e.g., such as those trained by GRAPE<sup>48</sup>) in order to promote their interoperability and reuse. For example, despite the recent  
385 proliferation of biomedical knowledge graphs<sup>58</sup>, there has been little convergence on standardized syntax or semantics for  
386 identifying nodes and edges. The Bioregistry can support this effort both on a low level and also by integrating into higher-level  
387 tools that generate and exchange graph-like data such as KGX and Biolink (see Supplementary Section 7.2) that support a larger  
388 variety of use cases. More generally, we believe that this will enable the growing audience of machine learning researchers who  
389 are interested in combining biomedical datasets in novel ways.

390 This vision aligns well with the recommendations from a recent assessment of the reproducibility of such models<sup>59</sup> that  
391 highlighted the more general importance of annotation using high-quality controlled vocabularies like GO and ChEBI.

392 Third, though biomedical ontologies have proven invaluable for data annotation, key ontologies still suffer from a lack  
393 of standardization of cross-references<sup>25</sup>, making it difficult to merge and reason across ontologies and other structured data  
394 sources. Given that ontologies are often curated in public version-controlled repositories in standardized formats (e.g., OBO,  
395 OWL), the Bioregistry could be used to support their semi-automated standardization and maintenance in order to both reduce  
396 curation burden and potentiate their value in data integration scenarios.

397 Finally, we envision the potential adoption of the Bioregistry by academic publishers to support the standardized annotation  
398 of named entities in the text provided by authors (e.g., the BioFactoid<sup>60</sup>), and thereby decrease the need for doing expensive  
399 and error-prone post-processing like automated named entity recognition on publications to create structured representations.

## 400 **Methods**

401 The Bioregistry repository tightly couples the data to a Python package that facilitates loading, accessing, and modifying the  
402 root data files. It provides several high-level data structures and workflows for accessing and reasoning over the Bioregistry  
403 and external registries' integrated data, that support the quality assurance workflows (described above), the web application  
404 (described above), the alignment workflows (described below), the generation of derived artifacts (described above) and other  
405 user-facing functionality such as prefix standardization, CURIE standardization, and URI parsing. Full documentation for the  
406 Python software package can be found at <https://bioregistry.readthedocs.io>.

### 407 **Alignment**

408 While manual curation of mappings to external registries is feasible when adding novel prefixes to the Bioregistry, the frequency  
409 of updates to external registries motivated the development and application of periodic automated and semi-automated alignment.

<sup>5</sup><https://biopragmatics.github.io/workshops/WPCI2021.html>

410 We first stratify all external registries into three categories based on their available metadata, biomedical scope, focus on  
411 assigning global prefixes to resources, and governance. The first group with metadata availability, a biomedical scope, and focus  
412 on assigning global prefixes contains the Identifiers.org, the OBO Foundry, OLS, N2T. The second group contains registries  
413 such as GO, NCBI, UniProt, Cellosaurus, and FAIRSharing that contain entries that do not correspond to identifier spaces  
414 which are excluded from the import. It additionally included registries like BioContext and BioPortal because of insufficient  
415 metadata that often made it impossible to determine what identifier resource the metadata refers to. The third group contains  
416 registries with minimal metadata or lack of biomedical focus such as Prefix.cc. The alignment algorithm first generates a  
417 lookup table based on the canonical prefix, preferred prefix, and all prefix synonyms (see Supplementary Section 3 for details  
418 on the data model and Supplementary Figure 2 for a schematic diagram of this process) for each resource in the Bioregistry.  
419 The prefix policies and automated quality assurance checks in the Bioregistry ensure that there are no collisions in this lookup  
420 table. For each external registry, the data are downloaded, normalized, and exactly one field is annotated as the external prefix  
421 (see Supplementary Figure 1). All Bioregistry prefixes that already have been mapped to an external prefix in the external  
422 registry are removed from the lookup table. Similarly, all external prefixes that already have mappings are not considered for  
423 new mappings. Each external prefix that matches an entry in the lookup table is assigned an automated mapping. A manually  
424 curated list of incorrect mappings and collisions are used to post-process the automated mappings and remove false negative  
425 mappings (see Supplementary Section 5.2). External prefixes that could not be mapped to a Bioregistry prefix are handled  
426 based on their stratification. For the first group of registries, the prefix is added as a new record to the Bioregistry. For the  
427 second group of registries, the prefix is added to a curation sheet along with its relevant metadata (e.g., title, homepage, example  
428 identifier) for later manual curation. For the third group of registries with minimal metadata, no report is made.

### 429 Promoting sustainability and longevity through automation

430 The Bioregistry is hosted on GitHub (<https://github.com/biopragmatics/bioregistry>) to take advantage of  
431 its public, cloud-based version control, collaboration, and workflow management platforms. The single source of truth data (i.e.,  
432 root data) for the Bioregistry is stored in version control. This implicitly versions all minor changes with git commit hashes and  
433 allows git tags to be used to mediate releases, which are automatically archived and re-distributed on both GitHub and Zenodo  
434 (<https://zenodo.org>).

435 The Bioregistry uses GitHub Actions as a continuous integration service to run code and data quality assurance to  
436 promote the maintainability and integrity of the resource (see Supplementary Section 4.1). They further enable workflows  
437 for automatically generating pull requests and notifying reviewers to enable non-technical users to make submissions to  
438 the resource. The Bioregistry further uses GitHub Actions as a continuous delivery and continuous deployment system to  
439 run the aforementioned alignment workflows, generate derived artifacts, release code to the Python Package Index (PyPI),  
440 containerize code on Docker Hub (<https://hub.docker.com>), deploy the web application to Amazon Web Services  
441 (<https://aws.amazon.com>) on a daily basis (see Supplementary Section 4.2). Combined, the continuous integration,  
442 delivery, and deployment services allow contributors and consumers of the Bioregistry to more easily propose improvements,  
443 review them as a community, and see them reflected in the data and website without the need for manual intervention by the  
444 project team. Using an entirely free, public, and open public infrastructure to do so promotes longevity and sustainability by  
445 mitigating the monetary requirements. Further, the technical requirements of the deployment of the web service and hosting are  
446 also minimized such that hosting costs around 33\$/year and compute costs around 27\$/year (see Supplementary Section 4.3).

### 447 Code availability

448 The source code for the Bioregistry is available at <https://github.com/biopragmatics/bioregistry> under the  
449 MIT License. The source code specific to the version of Bioregistry used in this article (v0.5.132) is archived on Zenodo<sup>38</sup>.

### 450 Data availability

451 All data analyzed during this study are available on GitHub at <https://github.com/biopragmatics/bioregistry>.  
452 The data specific to the version of Bioregistry used in this article (v0.5.132) is archived on Zenodo<sup>38</sup>.

### 453 References

- 454 1. Wilkinson, M. D. *et al.* The FAIR Guiding Principles for scientific data management and stewardship. *Sci. Data* **3**, 160018,  
455 [10.1038/sdata.2016.18](https://doi.org/10.1038/sdata.2016.18) (2016).
- 456 2. Jacobsen, A. *et al.* FAIR Principles: Interpretations and Implementation Considerations. *Data Intell.* **2**, 10–29, [10.1162/  
457 dint\\_r\\_00024](https://doi.org/10.1162/dint_r_00024) (2020).

- 458 3. Wilson, S. L. *et al.* Sharing biological data: why, when, and how. *FEBS Lett.* **595**, 847–863, [10.1002/1873-3468.14067](https://doi.org/10.1002/1873-3468.14067)  
459 (2021).
- 460 4. Hastings, J. *et al.* ChEBI in 2016: Improved services and an expanding collection of metabolites. *Nucleic Acids Res.* **44**,  
461 D1214–D1219, [10.1093/nar/gkv1031](https://doi.org/10.1093/nar/gkv1031) (2016).
- 462 5. Bateman, A. *et al.* UniProt: the universal protein knowledgebase in 2021. *Nucleic Acids Res.* **49**, D480–D489, [10.1093/  
463 nar/gkaa1100](https://doi.org/10.1093/nar/gkaa1100) (2021).
- 464 6. McMurry, J. A. *et al.* Identifiers for the 21st century: How to design, provision, and reuse persistent identifiers to maximize  
465 utility and impact of life science data. *PLoS Biol.* **15**, 1–18, [10.1371/journal.pbio.2001414](https://doi.org/10.1371/journal.pbio.2001414) (2017).
- 466 7. Tweedie, S. *et al.* Genenames.org: the HGNC and VGNC resources in 2021. *Nucleic Acids Res.* **49**, D939–D946,  
467 [10.1093/nar/gkaa980](https://doi.org/10.1093/nar/gkaa980) (2021).
- 468 8. Bansal, P. *et al.* Rhea, the reaction knowledgebase in 2022. *Nucleic Acids Res.* **50**, D693–D700, [10.1093/nar/gkab1016](https://doi.org/10.1093/nar/gkab1016)  
469 (2022).
- 470 9. Barrett, A. J. Enzyme Nomenclature. Recommendations 1992. *Eur. J. Biochem.* **232**, 1, [10.1111/j.1432-1033.1995.tb20774.  
471 x](https://doi.org/10.1111/j.1432-1033.1995.tb20774.x) (1995).
- 472 10. Fleischmann, A. *et al.* IntEnz, the integrated relational enzyme database. *Nucleic Acids Res.* **32**, D434–D437, [10.1093/nar/  
473 gkh119](https://doi.org/10.1093/nar/gkh119) (2004).
- 474 11. The Gene Ontology Consortium. The Gene Ontology Resource: 20 years and still GOing strong. *Nucleic Acids Res.* **47**,  
475 D330–D338, [10.1093/nar/gky1055](https://doi.org/10.1093/nar/gky1055) (2019).
- 476 12. Hoehndorf, R., Slater, L., Schofield, P. N. & Gkoutos, G. V. Aber-OWL: a framework for ontology-based data access in  
477 biology. *BMC Bioinforma.* **16**, 26, [10.1186/s12859-015-0456-9](https://doi.org/10.1186/s12859-015-0456-9) (2015).
- 478 13. Jonquet, C. *et al.* AgroPortal: A vocabulary and ontology repository for agronomy. *Comput. Electron. Agric.* **144**, 126–143,  
479 [10.1016/j.compag.2017.10.012](https://doi.org/10.1016/j.compag.2017.10.012) (2018).
- 480 14. Mungall, C. *et al.* prefixcommons/biocontext: v0.1.0, [10.5281/zenodo.6800248](https://doi.org/10.5281/zenodo.6800248) (2022).
- 481 15. Unni, D. R. *et al.* Biolink Model: A universal schema for knowledge graphs in clinical, biomedical, and translational  
482 science. *Clin. Transl. Sci.* [10.1111/cts.13302](https://doi.org/10.1111/cts.13302) (2022).
- 483 16. Whetzel, P. L. *et al.* BioPortal: enhanced functionality via new Web services from the National Center for Biomedical  
484 Ontology to access and use ontologies in software applications. *Nucleic Acids Res.* **39**, W541–5, [10.1093/nar/gkr469](https://doi.org/10.1093/nar/gkr469)  
485 (2011).
- 486 17. Bairoch, A. The Cellosaurus, a Cell-Line Knowledge Resource. *J. Biomol. Tech.* **29**, 25–38, [10.7171/jbt.18-2902-002](https://doi.org/10.7171/jbt.18-2902-002)  
487 (2018).
- 488 18. Hastings, J. *et al.* The chemical information ontology: Provenance and disambiguation for chemical data on the biological  
489 semantic web. *PLOS ONE* **6**, 1–13, [10.1371/journal.pone.0025513](https://doi.org/10.1371/journal.pone.0025513) (2011).
- 490 19. Arnaud, E. *et al.* The Ontologies Community of Practice: A CGIAR Initiative for Big Data in Agrifood Systems. *Patterns*  
491 **1**, 100105, [10.1016/j.patter.2020.100105](https://doi.org/10.1016/j.patter.2020.100105) (2020).
- 492 20. Kechagioglou, X., Vaira, L., Tomassino, P., Fiore, N. & Basset, A. EcoPortal : An Environment for FAIR Semantic  
493 Resources in the Ecological Domain. In *JOWO* (Bolzano, Italy, 2021).
- 494 21. Bender, D. & Sartipi, K. HL7 FHIR: An Agile and RESTful approach to healthcare information exchange. In *Proceedings*  
495 *of the 26th IEEE International Symposium on Computer-Based Medical Systems*, 326–331, [10.1109/CBMS.2013.6627810](https://doi.org/10.1109/CBMS.2013.6627810)  
496 (2013).
- 497 22. Sansone, S.-A. *et al.* FAIRsharing as a community approach to standards, repositories and policies. *Nat. Biotechnol.* **37**,  
498 358–367, [10.1038/s41587-019-0080-8](https://doi.org/10.1038/s41587-019-0080-8) (2019).
- 499 23. Juty, N., Le Novere, N. & Laibe, C. Identifiers.org and MIRIAM Registry: Community resources to provide persistent  
500 identification. *Nucleic Acids Res.* **40**, 580–586, [10.1093/nar/gkr1097](https://doi.org/10.1093/nar/gkr1097) (2012).
- 501 24. Clark, K., Karsch-Mizrachi, I., Lipman, D. J., Ostell, J. & Sayers, E. W. GenBank. *Nucleic Acids Res.* **44**, D67–72,  
502 [10.1093/nar/gkv1276](https://doi.org/10.1093/nar/gkv1276) (2016).
- 503 25. Jackson, R. C. *et al.* OBO Foundry in 2021: Operationalizing Open Data Principles to Evaluate Ontologies. *Database*  
504 *(Oxford)*. **2021**, 1–9, [10.1093/database/baab069](https://doi.org/10.1093/database/baab069) (2021).

- 505 **26.** Cote, R., Jones, P., Apweiler, R. & Hermjakob, H. The Ontology Lookup Service, a lightweight cross-platform tool for  
506 controlled vocabulary queries. *BMC Bioinforma.* **7**, 1–7, [10.1186/1471-2105-7-97](https://doi.org/10.1186/1471-2105-7-97) (2006).
- 507 **27.** Ong, E. *et al.* Ontobee: A linked ontology data server to support ontology term dereferencing, linkage, query and  
508 integration. *Nucleic Acids Res.* **45**, D347–D352, [10.1093/nar/gkw918](https://doi.org/10.1093/nar/gkw918) (2017).
- 509 **28.** Wimalaratne, S. M. *et al.* Uniform resolution of compact identifiers for biomedical data. *Sci. Data* **5**, 1–8, [10.1038/sdata.](https://doi.org/10.1038/sdata.2018.29)  
510 [2018.29](https://doi.org/10.1038/sdata.2018.29) (2018).
- 511 **29.** McMurry, J. & Kunze, J. Prefix commons. <https://github.com/prefixcommons/biocontext> (2017).
- 512 **30.** Waagmeester, A. *et al.* Wikidata as a knowledge graph for the life sciences. *Elife* **9**, [10.7554/eLife.52614](https://doi.org/10.7554/eLife.52614) (2020).
- 513 **31.** Schoch, C. L. *et al.* NCBI Taxonomy: a comprehensive update on curation, resources and tools. *Database* **2020**, baaa062,  
514 [10.1093/database/baaa062](https://doi.org/10.1093/database/baaa062) (2020).
- 515 **32.** van Iersel, M. P. *et al.* The BridgeDb framework: Standardized access to gene, protein and metabolite identifier mapping  
516 services. *BMC Bioinforma.* **11**, [10.1186/1471-2105-11-5](https://doi.org/10.1186/1471-2105-11-5) (2010).
- 517 **33.** Callahan, T. J., Tripodi, I. J., Hunter, L. E. & Baumgartner, W. A. A framework for automated construction of heterogeneous  
518 large-scale biomedical knowledge graphs. *bioRxiv* [10.1101/2020.04.30.071407](https://doi.org/10.1101/2020.04.30.071407) (2020).
- 519 **34.** Himmelstein, D. S. *et al.* Open collaborative writing with Manubot. *PLoS Comput. Biol.* **15**, e1007128, [10.1371/journal.](https://doi.org/10.1371/journal.pcbi.1007128)  
520 [pcbi.1007128](https://doi.org/10.1371/journal.pcbi.1007128) (2019).
- 521 **35.** Hoyt, C. T., Hoyt, A. & Gyori, B. M. Biomappings, [10.5281/zenodo.4323555](https://doi.org/10.5281/zenodo.4323555) (2021).
- 522 **36.** Matentzoglou, N. *et al.* A Simple Standard for Sharing Ontological Mappings (SSSOM). *Database* **2022**, baac035,  
523 [10.1093/database/baac035](https://doi.org/10.1093/database/baac035) (2022).
- 524 **37.** Gyori, B. M. *et al.* From word models to executable models of signaling networks using automated assembly. *Mol. Syst.*  
525 *Biol.* **13**, 954, [10.15252/msb.20177651](https://doi.org/10.15252/msb.20177651) (2017).
- 526 **38.** Hoyt, C. T. biopragmatics/bioregistry v0.5.132, [10.5281/zenodo.7216512](https://doi.org/10.5281/zenodo.7216512).
- 527 **39.** Gray, K. A., Seal, R. L., Tweedie, S., Wright, M. W. & Bruford, E. A. A review of the new HGNC gene family resource.  
528 *Hum. Genomics* **10**, 6, [10.1186/s40246-016-0062-6](https://doi.org/10.1186/s40246-016-0062-6) (2016).
- 529 **40.** Eschmeyer, W. & of Sciences, C. A. *Catalog of Fishes*. No. v. 4 in California Academy of Sciences. Center for Biodiversity  
530 Research and Information. 1 (California Academy of Sciences, 1998).
- 531 **41.** Midford, P. *et al.* The Teleost Taxonomy Ontology. *Nat. Preced.* [10.1038/npre.2010.4629.1](https://doi.org/10.1038/npre.2010.4629.1) (2010).
- 532 **42.** Midford, P. E. *et al.* The vertebrate taxonomy ontology: a framework for reasoning across model organism and species  
533 phenotypes. *J. Biomed. Semant.* **4**, 34, [10.1186/2041-1480-4-34](https://doi.org/10.1186/2041-1480-4-34) (2013).
- 534 **43.** Ison, J. *et al.* EDAM: an ontology of bioinformatics operations, types of data and identifiers, topics and formats.  
535 *Bioinformatics* **29**, 1325–1332, [10.1093/bioinformatics/btt113](https://doi.org/10.1093/bioinformatics/btt113) (2013).
- 536 **44.** Pratt, D. *et al.* NDEX, the Network Data Exchange. *Cell Syst.* **1**, 302–305, [10.1016/j.cels.2015.10.001](https://doi.org/10.1016/j.cels.2015.10.001) (2015).
- 537 **45.** Rando, H. M. *et al.* An Open-Publishing Response to the COVID-19 Infodemic., [10.48550/arXiv.2109.08633](https://doi.org/10.48550/arXiv.2109.08633) (2021).
- 538 **46.** Kishore, R. *et al.* Automated generation of gene summaries at the Alliance of Genome Resources. *Database* **2020**, baaa037,  
539 [10.1093/database/baaa037](https://doi.org/10.1093/database/baaa037) (2020).
- 540 **47.** Gyori, B. M., Hoyt, C. T. & Steppi, A. Gilda: biomedical entity text normalization with machine-learned disambiguation  
541 as a service. *Bioinforma. Adv.* **2**, [10.1093/bioadv/vbac034](https://doi.org/10.1093/bioadv/vbac034) (2022).
- 542 **48.** Cappelletti, L. *et al.* Grape: fast and scalable graph processing and embedding. *arXiv* [10.48550/arXiv.2110.06196](https://doi.org/10.48550/arXiv.2110.06196) (2021).
- 543 **49.** Willighagen, E. Bacting : a next generation , command line version of Bioclipse Statement of Need. *J. Open Source Softw.*  
544 **6**, 1–5, [10.21105/joss.02558](https://doi.org/10.21105/joss.02558) (2021).
- 545 **50.** Doherty, L. M. *et al.* Integrating multi-omics data reveals function and therapeutic potential of deubiquitinating enzymes.  
546 *eLife* **11**, e72879, [10.7554/eLife.72879](https://doi.org/10.7554/eLife.72879) (2022).
- 547 **51.** Bachman, J. A., Gyori, B. M. & Sorger, P. K. FamPlex: A resource for entity recognition and relationship resolution of  
548 human protein families and complexes in biomedical text mining. *BMC Bioinforma.* **19**, 1–14, [10.1186/s12859-018-2211-5](https://doi.org/10.1186/s12859-018-2211-5)  
549 (2018).
- 550 **52.** Mulder, N. J. *et al.* InterPro, progress and status in 2005. *Nucleic Acids Res.* **33**, D201–D205, [10.1093/nar/gki106](https://doi.org/10.1093/nar/gki106) (2005).
- 551 **53.** Rogers, F. B. Medical subject headings. *Bull. Med. Libr. Assoc.* **51**, 114–6 (1963).



- 552 **54.** Meldal, B. H. *et al.* The complex portal - An encyclopaedia of macromolecular complexes. *Nucleic Acids Res.* **43**,  
553 D479–D484, [10.1093/nar/gku975](https://doi.org/10.1093/nar/gku975) (2015).
- 554 **55.** Zahn-Zabal, M. *et al.* The neXtProt knowledgebase in 2020: data, tools and usability improvements. *Nucleic Acids Res.*  
555 **48**, D328–D334, [10.1093/nar/gkz995](https://doi.org/10.1093/nar/gkz995) (2019).
- 556 **56.** Sung, M. *et al.* Bern2: an advanced neural biomedical namedentity recognition and normalization tool. *arXiv* (2022).  
557 [2201.02080](https://arxiv.org/abs/2201.02080).
- 558 **57.** Malik-Sheriff, R. S. *et al.* BioModels — 15 years of sharing computational models in life science. *Nucleic Acids Res.* **48**,  
559 D407–D415, [10.1093/nar/gkz1055](https://doi.org/10.1093/nar/gkz1055) (2020).
- 560 **58.** Bonner, S. *et al.* A review of biomedical datasets relating to drug discovery: a knowledge graph perspective. *Briefings*  
561 *Bioinforma.* [10.1093/bib/bbac404](https://doi.org/10.1093/bib/bbac404) (2022).
- 562 **59.** Tiwari, K. *et al.* Reproducibility in systems biology modelling. *Mol. Syst. Biol.* **17**, e9982, [10.15252/msb.20209982](https://doi.org/10.15252/msb.20209982) (2021).
- 563 **60.** Wong, J. V. *et al.* Science Forum: Author-sourced capture of pathway knowledge in computable form using Biofactoid.  
564 *Elife* **10**, e68292, [10.7554/eLife.68292](https://doi.org/10.7554/eLife.68292) (2021).

## 565 **Acknowledgements**

566 CTH, KK, BMG were funded under the Defense Advanced Research Projects Agency (DARPA) Young Faculty Award  
567 [W911NF-20-1-0255]. EW received funding by NWO grant [203.001.121].

568 The authors would like to acknowledge the developers, maintainers, and curators of each of the external registries referenced  
569 throughout this manuscript and used in the Bioregistry, whose prior work enabled ours. More detailed "live" acknowledgments  
570 for these registries can be found at <https://bioregistry.io/acknowledgements>.

## 571 **Author contributions statement**

572 CTH and BMG conceived and implemented the software and resource, analyzed the results, and wrote the manuscript. CJM,  
573 JK, JM, and MAH contributed to the conception and design of the resource and software. AR, BMG, CTH, CJM, DDF, DSH,  
574 DW, MB, NM, SM, TL, and TJC performed data curation for the resource, BMG, CTH, DRU, EW, HBH, KK, NM, and SM  
575 contributed to the software. CJM, DSH, DRU, EW, JM, NM, SM, TJC co-wrote the manuscript. All authors reviewed and  
576 edited the manuscript.

## 577 **Competing interests**

578 DDF received salary from Enveda Biosciences.

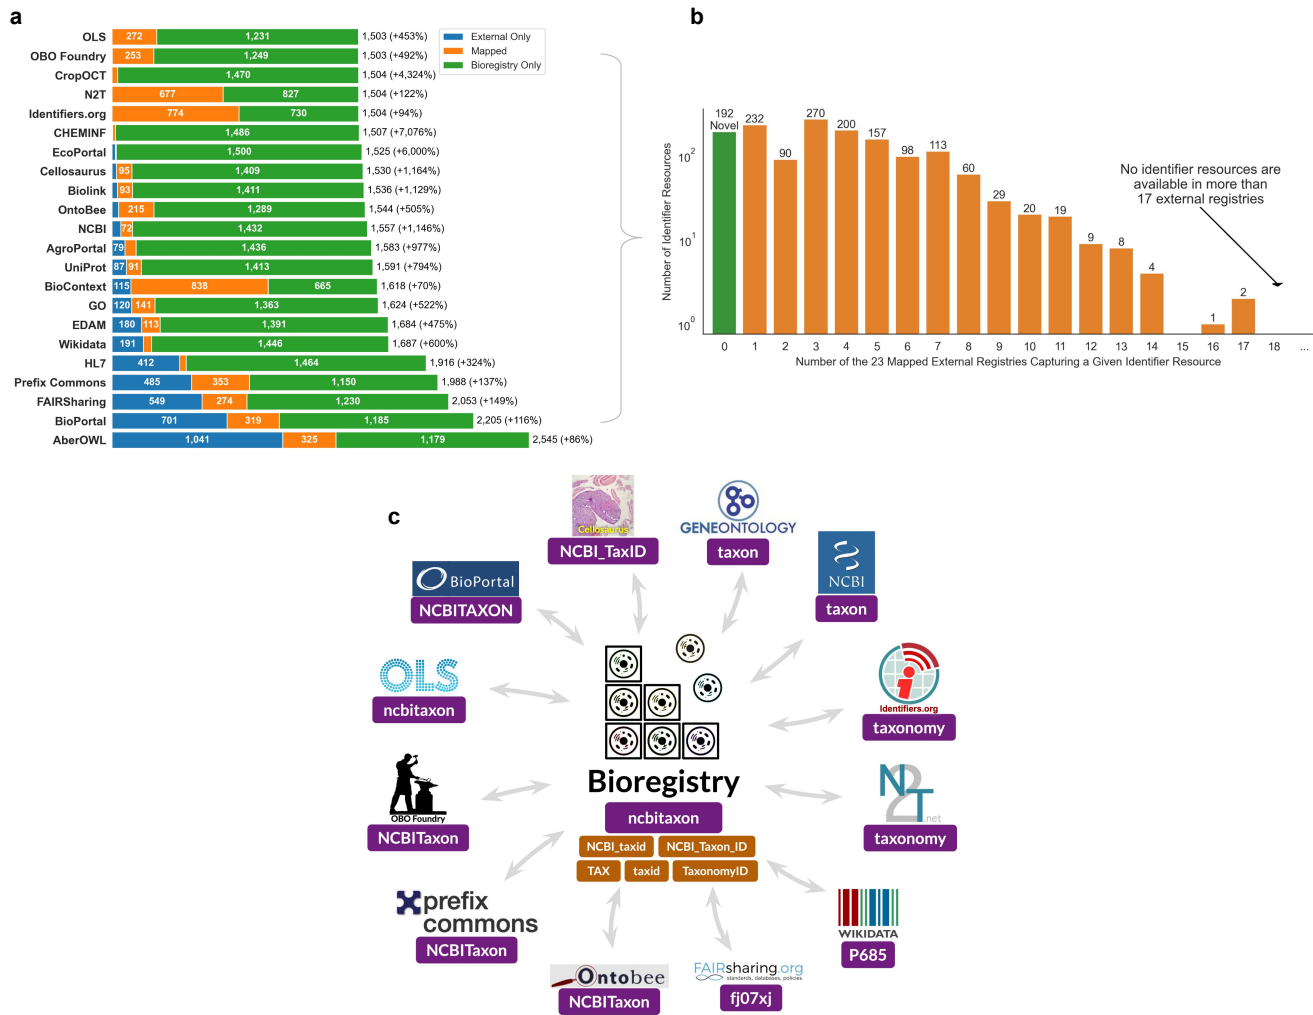

**Figure 1. A)** Summary of the pairwise overlap (in horizontal orange bars) between the prefixes in the Bioregistry and its integrated external registries. The horizontal blue bars show records that could not be automatically aligned and the horizontal green bars represent additional prefixes available in the Bioregistry but not the external resource. The absolute number of records in the union of the external registry with the Bioregistry (accounting for known overlaps) are shown on the right as well as the percentage relative gain introduced by the Bioregistry in parentheses. A large orange section corresponds to high content reuse while a large blue section corresponds to either high novelty of content in the external registry or high potential for semi-automated import into the Bioregistry. Counts on sections of these bar plots representing less than 70 prefixes are omitted. **B)** A histogram of how many cross references each entry in the Bioregistry has to external registries. The green bar highlights the prefixes with no cross references that only appear in the Bioregistry. **C)** A schematic diagram depicting the Bioregistry as an interoperability layer between external registries. Using the NCBI Taxonomy identifier resource as an example, prefixes used for this resource in external registries that the Bioregistry aligns are shown in purple boxes. Additional synonyms for this resource curated in the Bioregistry are shown in orange boxes. The components of this figure are regenerated daily with GitHub Actions and stored in <https://github.com/bioregistry/bioregistry/tree/main/docs/img>.

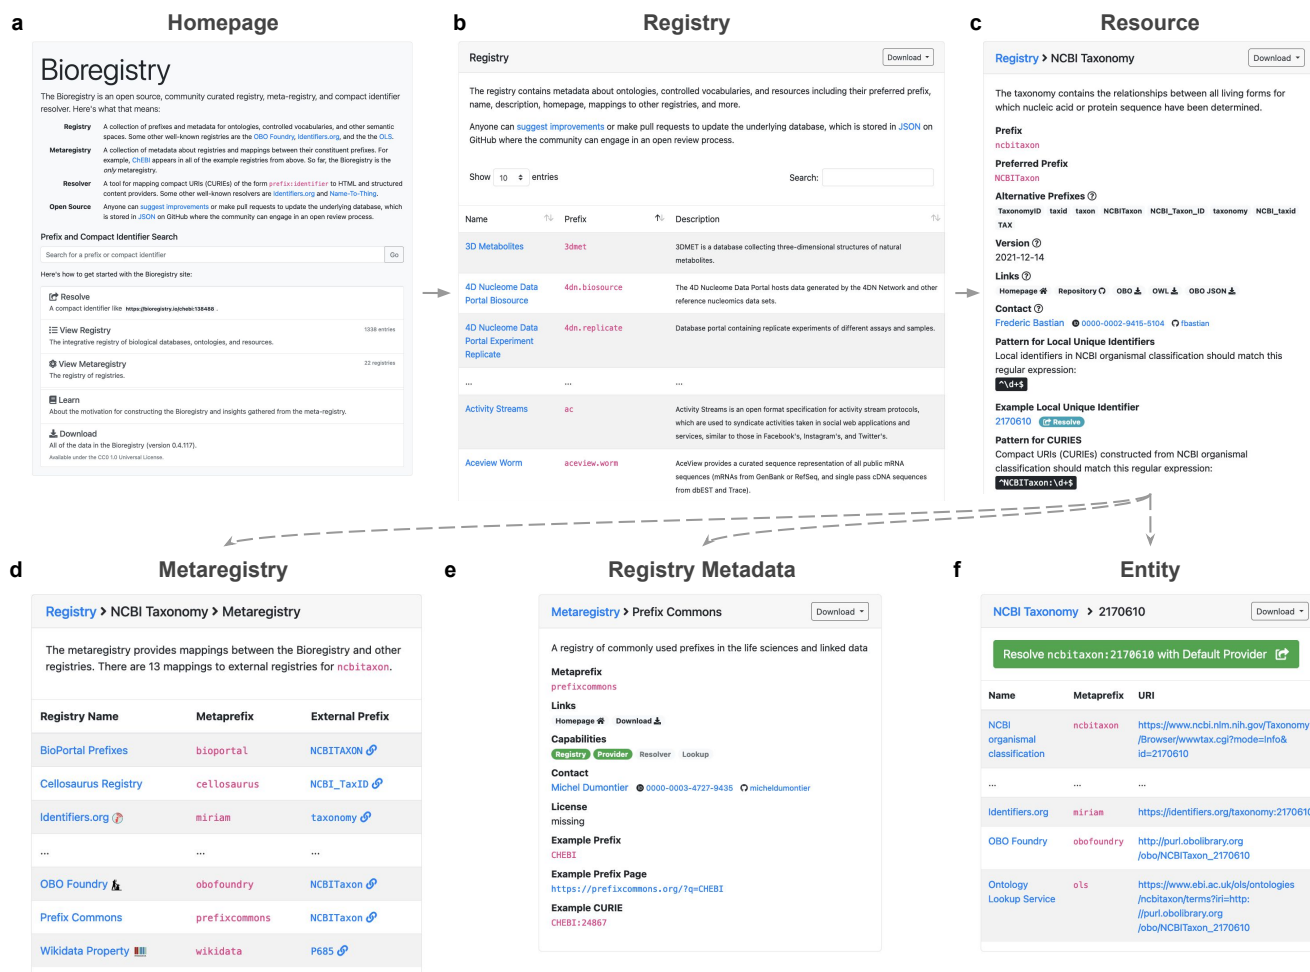

**Figure 2. Website Screenshots.** **A)** The homepage of <https://bioregistry.io> prominently features a combine prefix search and CURIE resolution box along with links to all of the components of the site. **B)** The full registry of prefixes, resource names, and descriptions can be viewed and full text search performed. **C)** Each prefix page shows metadata about the corresponding resource, its identifiers, and serves as a hub for additional functionality in D, E, and F. **D)** The prefix page additionally includes the metaregistry's cross-registry mappings from the prefix to external registries' prefixes. **E)** Each external registry page shows metadata and the capability list of external resources. **F)** a sample identifier demonstrates all of the providers that can be resolved.
